# Supplementary material
Source: PubMed Central journal article supplement (PMC7326346)
Supplement: NIHMS1598276-supplement-SI.pdf [file NIHMS1598276-supplement-SI.pdf]

## **Supporting Information**

### **Balanced Polarizable Drude Force Field Parameters for Molecular Anions: Phosphates, Sulfates, Sulfamates and Oxides**

Abhishek A. Kognole<sup>†</sup>, Asaminew H. Aytenfisu<sup>†</sup>, Alexander D. MacKerell Jr. \*

University of Maryland Computer-Aided Drug Design Center, Department of Pharmaceutical Sciences, School of Pharmacy, University of Maryland, Baltimore, Maryland 21201, United States

<sup>†</sup>These authors contributed equally to the manuscript and should be considered co-first authors

\*E-mail: alex@outerbanks.umaryland.edu; Telephone: +1-410-706-7442.

**Table S1.** Water-model compound minimum interaction energies ( $E_{\min}$ , kcal/mol) and distances ( $R_{\min}$ , Å) for dimethylphosphate (DMP) from the QM and the optimized, original nucleic acid and original lipid Drude models.

| Molecule | Atom | Orientation | $E_{\text{QM}}$ | $E_{\text{OPT}}$ | $E_{\text{Nucleic Acid}}$ | $E_{\text{Lipid}}$ | $E_{\text{(QM-OPT)}}$ | $E_{\text{(QM-NA)}}$ | $E_{\text{(QM-LIPID)}}$ | $R_{\text{QM}}$ | $R_{\text{OPT}}$ | $R_{\text{NA}}$ | $R_{\text{LIPID}}$ | $R_{\text{(QM-OPT)}}$ | $R_{\text{(QM-NA)}}$ | $R_{\text{(QM-LIPID)}}$ |
|----------|------|-------------|-----------------|------------------|---------------------------|--------------------|-----------------------|----------------------|-------------------------|-----------------|------------------|-----------------|--------------------|-----------------------|----------------------|-------------------------|
| dmp      | O1   | 0           | -7.86           | -6.78            | -6.41                     | -6.03              | -1.08                 | -1.45                | -1.83                   | 1.90            | 1.90             | 2.00            | 2.00               | 0.00                  | -0.10                | -0.10                   |
|          |      | 180         | -8.30           | -7.68            | -7.00                     | -6.84              | -0.61                 | -1.30                | -1.46                   | 1.95            | 1.90             | 1.95            | 1.95               | -0.05                 | 0.00                 | 0.00                    |
|          |      | 90          | -8.23           | -8.03            | -7.28                     | -7.22              | -0.20                 | -0.94                | -1.01                   | 2.00            | 2.00             | 2.00            | 2.00               | 0.00                  | 0.00                 | 0.00                    |
|          |      | 270         | -8.23           | -8.12            | -7.20                     | -7.35              | -0.12                 | -1.03                | -0.88                   | 2.05            | 2.00             | 2.00            | 2.00               | -0.05                 | 0.05                 | 0.05                    |
|          | O2   | 0           | -8.29           | -7.32            | -6.72                     | -6.52              | -0.97                 | -1.57                | -1.77                   | 1.95            | 1.95             | 1.95            | 2.00               | 0.00                  | 0.00                 | -0.05                   |
|          |      | 180         | -7.88           | -7.05            | -6.60                     | -6.25              | -0.84                 | -1.28                | -1.64                   | 1.95            | 1.90             | 1.95            | 1.95               | -0.05                 | 0.00                 | 0.00                    |
|          |      | 90          | -8.23           | -8.28            | -7.33                     | -7.49              | 0.05                  | -0.90                | -0.74                   | 2.05            | 1.95             | 2.00            | 2.00               | -0.10                 | 0.05                 | 0.05                    |
|          |      | 270         | -8.23           | -8.17            | -7.39                     | -7.34              | -0.06                 | -0.84                | -0.89                   | 2.00            | 1.95             | 2.00            | 2.00               | -0.05                 | 0.00                 | 0.00                    |
|          | O3   | 0           | -13.58          | -13.72           | -13.93                    | -12.39             | 0.13                  | 0.34                 | -1.20                   | 1.80            | 1.80             | 1.70            | 1.90               | 0.00                  | 0.10                 | -0.10                   |
|          |      | 180         | -12.28          | -12.47           | -12.26                    | -11.35             | 0.19                  | -0.03                | -0.93                   | 1.80            | 1.80             | 1.70            | 1.95               | 0.00                  | 0.10                 | -0.15                   |
|          |      | 90          | -12.75          | -12.95           | -13.00                    | -11.94             | 0.20                  | 0.25                 | -0.81                   | 1.75            | 1.80             | 1.70            | 1.95               | 0.05                  | 0.05                 | -0.20                   |
|          |      | 270         | -12.70          | -12.96           | -13.05                    | -11.87             | 0.25                  | 0.35                 | -0.84                   | 1.75            | 1.80             | 1.70            | 1.95               | 0.05                  | 0.05                 | -0.20                   |
|          | O4   | 0           | -8.45           | -7.97            | -7.51                     | -7.91              | -0.48                 | -0.94                | -0.54                   | 2.05            | 2.30             | 2.35            | 2.35               | 0.25                  | -0.30                | -0.30                   |
|          |      | 180         | -12.04          | -11.86           | -11.89                    | -10.83             | -0.18                 | -0.15                | -1.21                   | 1.80            | 1.80             | 1.70            | 1.95               | 0.00                  | 0.10                 | -0.15                   |
|          |      | 90          | -12.62          | -12.63           | -12.93                    | -11.58             | 0.01                  | 0.31                 | -1.04                   | 1.75            | 1.80             | 1.70            | 1.95               | 0.05                  | 0.05                 | -0.20                   |
|          |      | 270         | -12.86          | -12.79           | -12.97                    | -11.78             | -0.07                 | 0.10                 | -1.08                   | 1.75            | 1.80             | 1.70            | 1.95               | 0.05                  | 0.05                 | -0.20                   |

**Table S2.** Water-model compound minimum interaction energies ( $E_{\min}$ , kcal/mol) and distances ( $R_{\min}$ , Å) for methylphosphates and organic phosphates from the QM and the optimized and original Drude models. The average absolute difference for all model compounds not previously available in the Drude FF (MP\_0, HP\_1, MSO4, NMSM, NESM, MEO, ETO) is 0.06 kcal/mol.

| Molecule | Atom | Orientation | $E_{QM}$ | $E_{ORIG}$ | $E_{OPT}$ | $E_{(QM-ORIG)}$ | $E_{(QM-OPT)}$ | $R_{QM}$ | $R_{ORIG}$ | $R_{OPT}$ | $R_{(QM-ORIG)}$ | $R_{(QM-OPT)}$ |
|----------|------|-------------|----------|------------|-----------|-----------------|----------------|----------|------------|-----------|-----------------|----------------|
| mp_1     | O1   | 0           | -8.10    | -9.10      | -7.29     | 1.00            | -0.81          | 1.95     | 1.8        | 1.85      | 0.15            | 0.1            |
|          |      | 180         | -8.00    | -8.58      | -6.91     | 0.59            | -1.09          | 1.9      | 1.8        | 1.85      | 0.1             | 0.05           |
|          |      | 90          | -8.51    | -9.15      | -7.70     | 0.64            | -0.81          | 1.95     | 1.8        | 1.9       | 0.15            | 0.05           |
|          |      | 270         | -8.48    | -9.24      | -7.67     | 0.76            | -0.81          | 1.95     | 1.8        | 1.9       | 0.15            | 0.05           |
|          | O2   | 0           | -6.71    | -7.29      | -6.16     | 0.58            | -0.55          | 2.15     | 1.9        | 2         | 0.25            | 0.15           |
|          |      | 180         | -3.96    | -3.85      | -3.37     | -0.11           | -0.59          | 3.2      | 3.3        | 3.3       | -0.1            | -0.1           |
|          |      | 90          | -6.86    | -8.20      | -6.97     | 1.34            | 0.11           | 2.05     | 1.9        | 1.95      | 0.15            | 0.1            |
|          |      | 270         | -7.69    | -8.71      | -7.98     | 1.02            | 0.29           | 2.05     | 1.85       | 1.9       | 0.2             | 0.15           |
|          | O3   | 0           | -5.50    | -3.84      | -4.33     | -1.66           | -1.16          | 2        | 3          | 2.9       | -1              | -0.9           |
|          |      | 180         | -11.52   | -11.72     | -10.77    | 0.19            | -0.75          | 1.8      | 1.7        | 1.85      | 0.1             | -0.05          |
|          |      | 90          | -12.95   | -13.63     | -12.82    | 0.68            | -0.13          | 1.75     | 1.65       | 1.8       | 0.1             | -0.05          |
|          |      | 270         | -12.13   | -12.78     | -12.11    | 0.65            | -0.02          | 1.75     | 1.7        | 1.8       | 0.05            | -0.05          |
|          | O4   | 0           | -11.55   | -12.40     | -12.15    | 0.84            | 0.60           | 1.85     | 1.7        | 1.85      | 0.15            | 0              |
|          |      | 180         | -11.78   | -13.08     | -12.16    | 1.31            | 0.38           | 1.8      | 1.7        | 1.8       | 0.1             | 0              |
|          |      | 90          | -12.53   | -13.90     | -13.26    | 1.37            | 0.73           | 1.8      | 1.7        | 1.8       | 0.1             | 0              |
|          |      | 270         | -12.59   | -13.88     | -13.33    | 1.29            | 0.75           | 1.8      | 1.7        | 1.8       | 0.1             | 0              |
| mp_2     | O1   | 0           | -15.04   | -16.49     | -14.15    | 1.45            | -0.89          | 1.8      | 1.7        | 1.75      | 0.1             | 0.05           |
|          |      | 180         | -15.04   | -16.49     | -14.15    | 1.45            | -0.89          | 1.8      | 1.7        | 1.75      | 0.1             | 0.05           |
|          |      | 90          | -17.20   | -19.08     | -17.06    | 1.88            | -0.14          | 1.75     | 1.65       | 1.65      | 0.1             | 0.1            |
|          |      | 270         | -17.20   | -19.08     | -17.06    | 1.88            | -0.14          | 1.75     | 1.65       | 1.65      | 0.1             | 0.1            |
|          | O2   | 0           | -19.67   | -20.01     | -19.00    | 0.35            | -0.67          | 1.7      | 1.65       | 1.75      | 0.05            | -0.05          |
|          |      | 180         | -20.11   | -19.96     | -18.88    | -0.15           | -1.23          | 1.7      | 1.6        | 1.75      | 0.1             | -0.05          |
|          |      | 90          | -22.26   | -22.58     | -22.04    | 0.32            | -0.22          | 1.65     | 1.6        | 1.7       | 0.05            | -0.05          |
|          |      | 270         | -22.33   | -22.74     | -22.17    | 0.41            | -0.16          | 1.65     | 1.6        | 1.7       | 0.05            | -0.05          |
|          | O3   | 0           | -6.71    | -5.42      | -5.47     | -1.29           | -1.24          | 3.5      | 3.5        | 3.5       | 0               | 0              |
|          |      | 180         | -19.60   | -18.91     | -17.79    | -0.69           | -1.81          | 1.7      | 1.65       | 1.75      | 0.05            | -0.05          |
|          |      | 90          | -21.84   | -22.89     | -21.84    | 1.05            | 0.01           | 1.65     | 1.55       | 1.7       | 0.1             | -0.05          |
|          |      | 270         | -21.84   | -22.89     | -21.84    | 1.05            | 0.01           | 1.65     | 1.55       | 1.7       | 0.1             | -0.05          |
|          | O4   | 0           | -19.67   | -20.01     | -19.00    | 0.35            | -0.67          | 1.7      | 1.65       | 1.75      | 0.05            | -0.05          |
|          |      | 180         | -20.11   | -19.96     | -18.88    | -0.15           | -1.23          | 1.7      | 1.6        | 1.75      | 0.1             | -0.05          |
|          |      | 90          | -22.33   | -22.74     | -22.17    | 0.41            | -0.16          | 1.65     | 1.6        | 1.7       | 0.05            | -0.05          |
|          |      | 270         | -22.26   | -22.58     | -22.04    | 0.32            | -0.22          | 1.65     | 1.6        | 1.7       | 0.05            | -0.05          |
| hp_1     | O1   | 0           | -7.02    |            | -6.37     |                 | -0.65          | 2.1      |            | 2         |                 | 0.1            |
|          |      | 180         | -6.93    |            | -6.95     |                 | 0.03           | 2.15     |            | 1.95      |                 | 0.2            |
|          |      | 90          | -6.82    |            | -6.63     |                 | -0.19          | 2.1      |            | 1.95      |                 | 0.15           |

|     |        |        |        |        |        |        |       |       |       |       |      |       |       |
|-----|--------|--------|--------|--------|--------|--------|-------|-------|-------|-------|------|-------|-------|
|     | O2     | 270    | -7.61  | -7.68  | 0.07   | 2.05   | 1.95  | 0.1   |       |       |      |       |       |
|     |        | 0      | -6.94  | -6.96  | 0.02   | 2.15   | 1.95  | 0.2   |       |       |      |       |       |
|     |        | 180    | -7.02  | -6.37  | -0.65  | 2.1    | 2     | 0.1   |       |       |      |       |       |
|     |        | 90     | -7.61  | -7.68  | 0.06   | 2.05   | 1.95  | 0.1   |       |       |      |       |       |
|     | O3     | 270    | -6.82  | -6.63  | -0.19  | 2.1    | 1.95  | 0.15  |       |       |      |       |       |
|     |        | 0      | -11.62 | -12.49 | 0.87   | 1.85   | 1.8   | 0.05  |       |       |      |       |       |
|     |        | 180    | -11.77 | -12.41 | 0.65   | 1.8    | 1.8   | 0     |       |       |      |       |       |
|     |        | 90     | -12.62 | -13.73 | 1.11   | 1.8    | 1.8   | 0     |       |       |      |       |       |
|     | O4     | 270    | -12.63 | -13.68 | 1.05   | 1.8    | 1.8   | 0     |       |       |      |       |       |
|     |        | 0      | -12.58 | -12.12 | -0.45  | 1.75   | 1.8   | -0.05 |       |       |      |       |       |
|     |        | 180    | -11.52 | -10.63 | -0.89  | 1.8    | 1.85  | -0.05 |       |       |      |       |       |
|     |        | 90     | -12.19 | -12.18 | -0.01  | 1.75   | 1.8   | -0.05 |       |       |      |       |       |
|     | hp_2   | O1     | 270    | -12.94 | -12.75 | -0.19  | 1.75  | 1.8   | -0.05 |       |      |       |       |
|     |        |        | 0      | -12.22 | -12.77 | -10.76 | 0.55  | -1.46 | 2.4   | 2.15  | 2.45 | 0.25  | -0.05 |
|     |        |        | 180    | -12.22 | -12.77 | -10.76 | 0.55  | -1.46 | 2.4   | 2.15  | 2.45 | 0.25  | -0.05 |
|     |        |        | 90     | -13.48 | -15.88 | -13.60 | 2.40  | 0.11  | 2     | 1.8   | 1.85 | 0.2   | 0.15  |
| O2  |        | 270    | -13.48 | -15.88 | -13.60 | 2.40   | 0.11  | 2     | 1.8   | 1.85  | 0.2  | 0.15  |       |
|     |        | 0      | -20.40 | -20.45 | -19.67 | 0.05   | -0.73 | 1.7   | 1.6   | 1.75  | 0.1  | -0.05 |       |
|     |        | 180    | -20.66 | -20.23 | -19.41 | -0.42  | -1.24 | 1.7   | 1.6   | 1.75  | 0.1  | -0.05 |       |
|     |        | 90     | -22.99 | -23.17 | -22.79 | 0.17   | -0.20 | 1.65  | 1.6   | 1.7   | 0.05 | -0.05 |       |
| O3  |        | 270    | -22.93 | -23.11 | -22.74 | 0.18   | -0.19 | 1.65  | 1.6   | 1.7   | 0.05 | -0.05 |       |
|     |        | 0      | -20.40 | -20.45 | -19.67 | 0.05   | -0.73 | 1.7   | 1.6   | 1.75  | 0.1  | -0.05 |       |
|     |        | 180    | -20.66 | -20.23 | -19.41 | -0.42  | -1.24 | 1.7   | 1.6   | 1.75  | 0.1  | -0.05 |       |
|     |        | 90     | -22.93 | -23.11 | -22.75 | 0.18   | -0.19 | 1.65  | 1.6   | 1.7   | 0.05 | -0.05 |       |
| O4  |        | 270    | -22.99 | -23.17 | -22.79 | 0.17   | -0.20 | 1.65  | 1.6   | 1.7   | 0.05 | -0.05 |       |
|     |        | 0      | -18.74 | -20.30 | -19.27 | 1.56   | 0.53  | 1.65  | 1.6   | 1.7   | 0.05 | -0.05 |       |
|     |        | 180    | -20.52 | -18.87 | -18.22 | -1.65  | -2.31 | 1.7   | 1.65  | 1.75  | 0.05 | -0.05 |       |
|     |        | 90     | -22.86 | -22.52 | -22.18 | -0.34  | -0.68 | 1.65  | 1.6   | 1.7   | 0.05 | -0.05 |       |
| 270 | -22.86 | -22.52 | -22.18 | -0.34  | -0.68  | 1.65   | 1.6   | 1.7   | 0.05  | -0.05 |      |       |       |

**Table S3.** Water-model compound minimum interaction energies ( $E_{\min}$ , kcal/mol) and distances ( $R_{\min}$ , Å) for for molecular ions other than phosphate from the QM and the optimized Drude models.

| Molecule | Atom | Orientation | $E_{\text{QM}}$ | $E_{\text{OPT}}$ | $E_{(\text{QM-OPT})}$ | $R_{\text{QM}}$ | $R_{\text{OPT}}$ | $R_{(\text{QM-OPT})}$ |
|----------|------|-------------|-----------------|------------------|-----------------------|-----------------|------------------|-----------------------|
| msO4     | O1   | 0           | -7.90           | -7.45            | -0.45                 | 1.95            | 1.9              | 0.05                  |
|          |      | 180         | -7.90           | -7.45            | -0.45                 | 1.95            | 1.9              | 0.05                  |
|          |      | 90          | -8.06           | -8.20            | 0.14                  | 2               | 1.95             | 0.05                  |
|          |      | 270         | -8.06           | -8.20            | 0.14                  | 2               | 1.95             | 0.05                  |
|          | O2   | 0           | -9.38           | -9.41            | 0.03                  | 1.9             | 1.9              | 0                     |
|          |      | 180         | -9.46           | -9.73            | 0.28                  | 1.9             | 1.9              | 0                     |
|          |      | 90          | -10.01          | -10.82           | 0.82                  | 1.85            | 1.85             | 0                     |
|          |      | 270         | -10.01          | -10.82           | 0.82                  | 1.85            | 1.85             | 0                     |
|          | O3   | 0           | -9.67           | -9.22            | -0.45                 | 1.85            | 1.9              | -0.05                 |
|          |      | 180         | -9.47           | -8.91            | -0.56                 | 1.9             | 1.9              | 0                     |
|          |      | 90          | -10.05          | -10.22           | 0.17                  | 1.85            | 1.85             | 0                     |
|          |      | 270         | -10.28          | -10.60           | 0.32                  | 1.85            | 1.85             | 0                     |
|          | O4   | 0           | -9.32           | -8.39            | -0.93                 | 1.9             | 1.95             | -0.05                 |
|          |      | 180         | -9.70           | -9.69            | -0.01                 | 1.85            | 1.9              | -0.05                 |
|          |      | 90          | -10.28          | -10.60           | 0.32                  | 1.85            | 1.85             | 0                     |
|          |      | 270         | -10.05          | -10.22           | 0.17                  | 1.85            | 1.85             | 0                     |
| so4      | O1   | 0           | -19.14          | -17.33           | -1.81                 | 1.7             | 1.8              | -0.1                  |
|          |      | 180         | -19.24          | -17.47           | -1.77                 | 1.7             | 1.75             | -0.05                 |
|          |      | 90          | -20.78          | -20.77           | -0.01                 | 1.65            | 1.7              | -0.05                 |
|          |      | 270         | -20.76          | -20.77           | 0.01                  | 1.7             | 1.7              | 0                     |
|          | O2   | 0           | -19.12          | -17.32           | -1.80                 | 1.7             | 1.8              | -0.1                  |
|          |      | 180         | -19.22          | -17.46           | -1.76                 | 1.7             | 1.75             | -0.05                 |
|          |      | 90          | -20.77          | -20.76           | 0.00                  | 1.65            | 1.7              | -0.05                 |
|          |      | 270         | -20.77          | -20.76           | 0.00                  | 1.65            | 1.7              | -0.05                 |
|          | O3   | 0           | -19.13          | -17.32           | -1.81                 | 1.7             | 1.8              | -0.1                  |
|          |      | 180         | -19.22          | -17.46           | -1.76                 | 1.7             | 1.75             | -0.05                 |
|          |      | 90          | -20.77          | -20.77           | -0.01                 | 1.65            | 1.7              | -0.05                 |
|          |      | 270         | -20.77          | -20.77           | -0.01                 | 1.65            | 1.7              | -0.05                 |
|          | O4   | 0           | -19.13          | -17.32           | -1.80                 | 1.7             | 1.8              | -0.1                  |
|          |      | 180         | -19.23          | -17.46           | -1.77                 | 1.7             | 1.75             | -0.05                 |
|          |      | 90          | -20.77          | -20.77           | -0.01                 | 1.65            | 1.7              | -0.05                 |
|          |      | 270         | -20.77          | -20.77           | -0.01                 | 1.65            | 1.7              | -0.05                 |
| msna     | O1   | 0           | -10.26          | -9.66            | -0.61                 | 1.85            | 1.9              | -0.05                 |
|          |      | 180         | -10.85          | -10.02           | -0.83                 | 1.85            | 1.85             | 0                     |
|          |      | 90          | -11.12          | -11.50           | 0.39                  | 1.8             | 1.85             | -0.05                 |
|          |      | 270         | -10.57          | -11.01           | 0.45                  | 1.85            | 1.85             | 0                     |

|      |      |        |        |        |        |       |      |       |     |
|------|------|--------|--------|--------|--------|-------|------|-------|-----|
|      | O2   | 0      | -10.26 | -9.66  | -0.60  | 1.85  | 1.9  | -0.05 |     |
|      |      | 180    | -10.85 | -10.02 | -0.82  | 1.85  | 1.85 | 0     |     |
|      |      | 90     | -10.56 | -11.01 | 0.45   | 1.85  | 1.85 | 0     |     |
|      |      | 270    | -11.11 | -11.50 | 0.39   | 1.8   | 1.85 | -0.05 |     |
|      | O3   | 0      | -10.26 | -9.66  | -0.60  | 1.85  | 1.9  | -0.05 |     |
|      |      | 180    | -10.85 | -10.02 | -0.83  | 1.85  | 1.85 | 0     |     |
|      |      | 90     | -11.12 | -11.50 | 0.39   | 1.8   | 1.85 | -0.05 |     |
|      |      | 270    | -10.56 | -11.01 | 0.45   | 1.85  | 1.85 | 0     |     |
| nmsm | N    | 0      | -8.86  | -8.16  | -0.71  | 2     | 1.9  | 0.1   |     |
|      |      | 180    | -10.94 | -10.37 | -0.57  | 1.95  | 1.85 | 0.1   |     |
|      | O2   | 0      | -11.53 | -10.77 | -0.76  | 1.9   | 1.95 | -0.05 |     |
|      |      | 180    | -10.33 | -11.38 | 1.04   | 1.9   | 1.9  | 0     |     |
|      |      | 90     | -10.34 | -11.12 | 0.78   | 1.85  | 1.85 | 0     |     |
|      |      | 270    | -10.64 | -11.39 | 0.75   | 1.85  | 1.85 | 0     |     |
|      | O3   | 0      | -12.33 | -11.89 | -0.45  | 1.85  | 1.9  | -0.05 |     |
|      |      | 180    | -10.21 | -10.67 | 0.47   | 1.85  | 1.85 | 0     |     |
|      |      | 90     | -10.37 | -11.28 | 0.91   | 1.85  | 1.85 | 0     |     |
|      |      | 270    | -10.58 | -11.33 | 0.75   | 1.85  | 1.85 | 0     |     |
|      | O4   | 0      | -12.71 | -11.72 | -0.98  | 1.85  | 1.9  | -0.05 |     |
|      |      | 180    | -10.20 | -10.21 | 0.01   | 1.85  | 1.85 | 0     |     |
|      |      | 90     | -10.97 | -11.10 | 0.12   | 1.8   | 1.85 | -0.05 |     |
|      |      | 270    | -10.36 | -10.56 | 0.20   | 1.85  | 1.85 | 0     |     |
|      | nesm | N      | 0      | -8.51  | -8.63  | 0.12  | 2    | 1.9   | 0.1 |
|      |      |        | 180    | -11.00 | -10.75 | -0.25 | 1.95 | 1.85  | 0.1 |
| O2   |      | 0      | -10.08 | -9.13  | -0.95  | 1.85  | 1.9  | -0.05 |     |
|      |      | 180    | -10.19 | -9.30  | -0.88  | 1.85  | 1.9  | -0.05 |     |
|      |      | 90     | -10.29 | -10.63 | 0.34   | 1.85  | 1.85 | 0     |     |
|      |      | 270    | -10.88 | -11.19 | 0.31   | 1.8   | 1.85 | -0.05 |     |
| O3   |      | 0      | -9.92  | -9.90  | -0.02  | 1.85  | 1.9  | -0.05 |     |
|      |      | 180    | -9.80  | -9.94  | 0.14   | 1.85  | 1.9  | -0.05 |     |
|      |      | 90     | -10.13 | -11.20 | 1.07   | 1.85  | 1.85 | 0     |     |
|      |      | 270    | -10.53 | -11.45 | 0.92   | 1.85  | 1.85 | 0     |     |
| O4   |      | 0      | -9.88  | -9.62  | -0.26  | 1.85  | 1.9  | -0.05 |     |
|      |      | 180    | -9.75  | -9.76  | 0.01   | 1.9   | 1.9  | 0     |     |
|      | 90   | -10.54 | -11.19 | 0.64   | 1.85   | 1.85  | 0    |       |     |
|      | 270  | -10.10 | -10.96 | 0.86   | 1.85   | 1.85  | 0    |       |     |
| eto  | O    | 0      | -19.12 | -19.20 | 0.08   | 2.3   | 2.25 | 0.05  |     |
|      |      | 180    | -19.37 | -17.78 | -1.59  | 2.3   | 2.25 | 0.05  |     |
|      |      | 90     | -18.03 | -17.84 | -0.19  | 1.7   | 1.6  | 0.1   |     |
|      |      | 270    | -18.07 | -17.88 | -0.19  | 1.7   | 1.6  | 0.1   |     |
| meo  | O    | 0      | -20.77 | -20.58 | -0.19  | 1.65  | 1.6  | 0.05  |     |
|      |      | 180    | -20.44 | -19.69 | -0.75  | 1.65  | 1.6  | 0.05  |     |
|      |      | 90     | -18.91 | -19.37 | 0.47   | 1.65  | 1.6  | 0.05  |     |
|      |      | 270    | -18.91 | -19.37 | 0.47   | 1.65  | 1.6  | 0.05  |     |

**Table S4.** Dipole moments from the QM and Drude models for dimethylphosphate (DMP). For the Drude model the optimized values and those from the original nucleic acid and lipid parameter sets are shown.

|                    | Dipole Moment |       |              |       | Error       |             |              |       |
|--------------------|---------------|-------|--------------|-------|-------------|-------------|--------------|-------|
|                    | QM            | Opt   | Nucleic Acid | Lipid | QM-Opt      | QM-NA       | QM-Lipid     |       |
| DMP                | XX            | 3.55  | 3.36         | 2.96  | 3.64        | 0.19        | 0.59         | -0.09 |
|                    | YY            | -4.35 | -4.12        | -3.52 | -4.47       | -0.23       | -0.83        | 0.12  |
|                    | ZZ            | 0.37  | 0.14         | 0.31  | 0.39        | 0.23        | 0.07         | -0.02 |
|                    | Total         | 5.63  | 5.32         | 4.61  | 5.78        | 0.31        | 1.01         | -0.15 |
| AVG_Difference     |               |       |              |       | <b>0.12</b> | <b>0.21</b> | <b>-0.04</b> |       |
| ABS_AVG_Difference |               |       |              |       | <b>0.03</b> | <b>0.30</b> | <b>0.04</b>  |       |
| STDEV_Difference   |               |       |              |       | <b>0.24</b> | <b>0.79</b> | <b>0.12</b>  |       |
| RMSD_Difference    |               |       |              |       | <b>0.28</b> | <b>0.83</b> | <b>0.12</b>  |       |

**Table S5.** Dipole moments of QM and Drude force field for molecular ions excluding DMP. For molecules in which the electrostatic parameters were not updated only the optimized, final values are shown.

|      | Dipole Moment |       |       | Error  |         |
|------|---------------|-------|-------|--------|---------|
|      | QM            | Opt   | Orig  | QM-Opt | QM-Orig |
| MP_0 | XX            | -1.18 | -1.28 | 0.10   |         |
|      | YY            | 1.62  | 1.21  | 0.41   |         |
|      | ZZ            | 1.66  | 1.83  | -0.17  |         |
|      | Total         | 2.60  | 2.54  | 0.06   |         |
| MP_1 | XX            | -0.46 | -0.46 | -1.02  | 0.56    |
|      | YY            | 3.61  | 3.50  | 2.66   | 0.94    |
|      | ZZ            | 2.74  | 2.88  | 3.13   | -0.39   |
|      | Total         | 4.55  | 4.55  | 4.23   | 0.32    |
| MP_2 | XX            | -0.39 | -0.87 | -1.20  | 0.81    |
|      | YY            | 3.88  | 3.74  | 3.90   | -0.02   |
|      | ZZ            | 0.00  | 0.00  | 0.00   | 0.00    |
|      | Total         | 3.90  | 3.84  | 4.07   | -0.18   |
| HP_1 | XX            | -3.24 | -3.22 | -0.03  |         |
|      | YY            | 0.22  | -0.16 | 0.37   |         |
|      | ZZ            | 1.01  | 1.36  | -0.36  |         |
|      | Total         | 3.40  | 3.50  | -0.09  |         |
| HP_2 | XX            | -1.54 | -1.43 | -1.09  | -0.45   |
|      | YY            | -1.19 | -1.35 | -0.66  | -0.53   |
|      | ZZ            | 0.84  | 0.77  | 0.61   | 0.23    |

|                    |       |        |        |      |             |             |
|--------------------|-------|--------|--------|------|-------------|-------------|
|                    | Total | 2.12   | 2.11   | 1.42 | 0.01        | 0.70        |
| SO4                | XX    | 0.00   | 0.00   |      | 0.00        |             |
|                    | YY    | 0.00   | 0.00   |      | 0.00        |             |
|                    | ZZ    | 0.00   | 0.00   |      | 0.00        |             |
|                    | Total | 0.00   | 0.00   |      | 0.00        |             |
| MSO4               | XX    | -2.90  | -2.52  |      | -0.38       |             |
|                    | YY    | -1.92  | -2.54  |      | 0.61        |             |
|                    | ZZ    | -0.34  | -0.22  |      | -0.12       |             |
|                    | Total | 3.50   | 3.58   |      | -0.08       |             |
| NMSM               | XX    | 0.93   | 1.05   |      | -0.12       |             |
|                    | YY    | 3.44   | 2.96   |      | 0.48        |             |
|                    | ZZ    | -2.04  | -2.49  |      | 0.45        |             |
|                    | Total | 4.10   | 4.01   |      | 0.10        |             |
| NESM               | XX    | -11.50 | -11.46 |      | -0.04       |             |
|                    | YY    | 0.35   | -0.04  |      | 0.39        |             |
|                    | ZZ    | 0.58   | 1.12   |      | -0.54       |             |
|                    | Total | 11.52  | 11.52  |      | 0.01        |             |
| MEO                | XX    | -4.60  | -4.50  |      | -0.10       |             |
|                    | YY    | -0.43  | -0.42  |      | -0.01       |             |
|                    | ZZ    | -0.36  | -0.35  |      | -0.01       |             |
|                    | Total | 4.64   | 4.53   |      | 0.10        |             |
| ETO                | XX    | -4.44  | -4.70  |      | 0.26        |             |
|                    | YY    | 2.19   | 2.04   |      | 0.16        |             |
|                    | ZZ    | -3.45  | -3.17  |      | -0.27       |             |
|                    | Total | 6.03   | 6.02   |      | 0.01        |             |
| AVG_Difference     |       |        |        |      | <b>0.05</b> | <b>0.17</b> |
| ABS_AVG_Difference |       |        |        |      | <b>0.16</b> | <b>0.43</b> |
| STDEV_Difference   |       |        |        |      | <b>0.23</b> | <b>0.30</b> |
| RMSD_Difference    |       |        |        |      | <b>0.24</b> | <b>0.54</b> |



**Table S6.** Calculated hydration free energies with individual contributions and corrections for each species. All values are in kcal/mol.

| RESID | $\Delta G_{aqueous}$ | $\Delta G_{gas}$ | Interfacial Correction ( $z f \Phi$ ) | Entropic Correction | Long Range Correction | $\Delta G_{Drude}$ (opt) |
|-------|----------------------|------------------|---------------------------------------|---------------------|-----------------------|--------------------------|
| DMP   | -204.26 ± 0.06       | -109.55 ± 0.01   | 12.45                                 | 1.90                | -0.68                 | -81.04 ± 0.08            |
| MP_0  | -156.15 ± 0.17       | -144.32 ± 0.10   | 0.00                                  | 1.90                | -0.51                 | -10.47 ± 0.22            |
| MP_1  | -208.26 ± 0.27       | -116.47 ± 0.03   | 12.45                                 | 1.90                | -0.56                 | -77.99 ± 0.29            |
| MP_2  | -369.87 ± 0.25       | -78.38 ± 0.02    | 24.90                                 | 1.90                | -0.59                 | -265.27 ± 0.25           |
| HP_1  | -215.58 ± 0.17       | -121.44 ± 0.01   | 12.45                                 | 1.90                | -0.39                 | -80.25 ± 0.18            |
| HP_2  | -388.02 ± 0.16       | -86.16 ± 0.01    | 24.90                                 | 1.90                | -0.48                 | -275.54 ± 0.16           |
| SO4   | -289.49 ± 0.31       | 0.00 ± 0.00      | 24.90                                 | 1.90                | -0.50                 | -263.19 ± 0.31           |
| MSO4  | -146.80 ± 0.00       | -65.21 ± 0.03    | 12.45                                 | 1.90                | -0.59                 | -67.83 ± 0.03            |
| MSNA  | -109.26 ± 0.10       | -24.91 ± 0.00    | 12.45                                 | 1.90                | -0.51                 | -70.51 ± 0.10            |
| NMSM  | -237.62 ± 0.09       | -151.04 ± 0.01   | 12.45                                 | 1.90                | -0.61                 | -72.83 ± 0.09            |
| NESM  | -231.51 ± 0.29       | -145.08 ± 0.04   | 12.45                                 | 1.90                | -0.59                 | -72.77 ± 0.26            |
| MEO   | -114.76 ± 0.11       | 0.00 ± 0.00      | 12.45                                 | 1.90                | -0.23                 | -100.64 ± 0.11           |
| ETO   | -117.24 ± 0.32       | -7.60 ± 0.00     | 12.45                                 | 1.90                | -0.33                 | -95.62 ± 0.32            |

**Table S7.** Molecular polarizability tensors from the QM and Drude models.

| Molecule | QM    |       |      |       | Drude_opt |      |      |       |
|----------|-------|-------|------|-------|-----------|------|------|-------|
|          | XX    | YY    | ZZ   | total | XX        | YY   | ZZ   | total |
| DMP      | 10.61 | 9.67  | 8.86 | 29.13 | 7.63      | 7.24 | 6.59 | 21.46 |
| MP_0     | 6.78  | 7.94  | 6.70 | 21.42 | 5.57      | 7.25 | 5.82 | 18.63 |
| MP_1     | 7.34  | 8.56  | 7.49 | 23.39 | 6.24      | 6.59 | 5.54 | 18.37 |
| MP_2     | 7.94  | 10.37 | 8.44 | 26.74 | 5.95      | 5.68 | 6.06 | 17.69 |
| HP_1     | 6.21  | 5.85  | 5.72 | 17.78 | 5.64      | 5.19 | 4.98 | 15.81 |
| HP_2     | 6.83  | 6.36  | 6.60 | 19.79 | 5.08      | 4.73 | 5.12 | 14.93 |
| SO4      | 5.81  | 5.81  | 5.81 | 17.44 | 4.10      | 4.10 | 4.10 | 12.29 |
| MSO4     | 7.74  | 7.65  | 6.95 | 22.34 | 5.32      | 5.90 | 5.67 | 16.88 |
| MSNA     | 7.56  | 6.92  | 6.92 | 21.41 | 4.98      | 5.03 | 5.04 | 15.05 |
| NMSM     | 7.56  | 8.31  | 8.51 | 24.38 | 6.56      | 6.47 | 6.93 | 19.97 |
| NESM     | 11.78 | 9.32  | 9.10 | 30.20 | 8.89      | 7.63 | 7.61 | 24.13 |
| MEO      | 5.03  | 4.13  | 4.12 | 13.28 | 2.81      | 2.33 | 2.33 | 7.47  |
| ETO      | 6.99  | 6.27  | 6.83 | 20.09 | 6.96      | 3.84 | 4.03 | 14.82 |

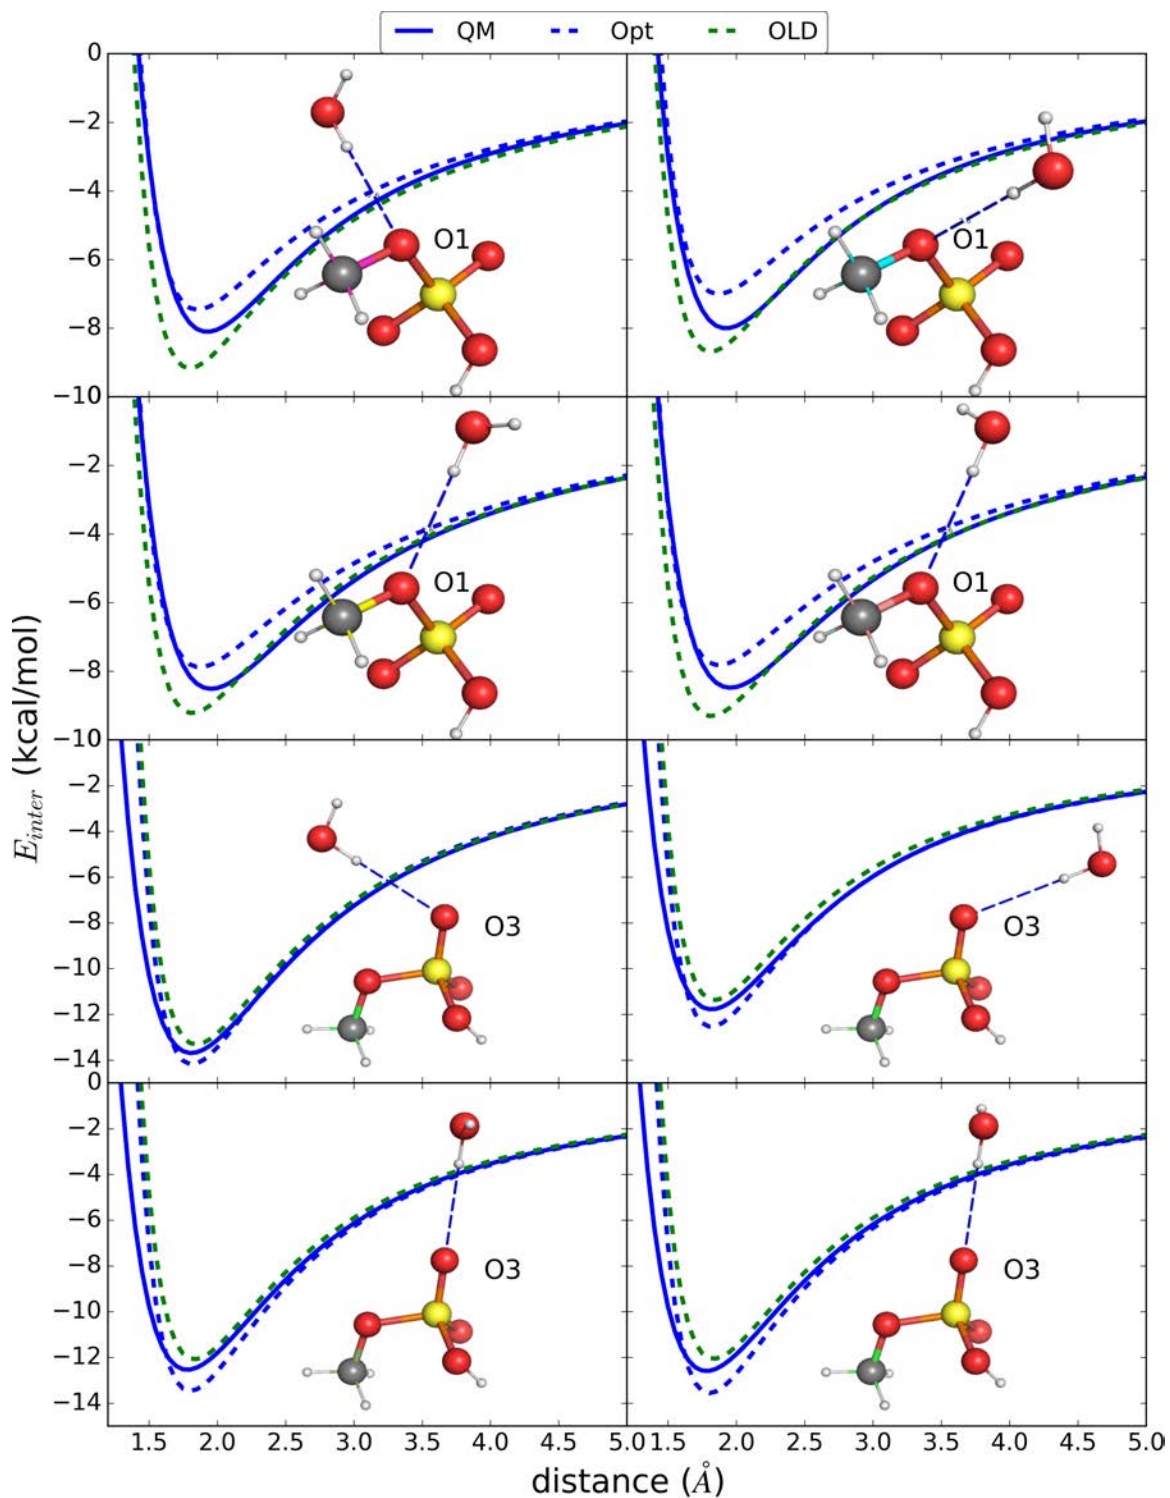

**Figure S1.** Water interaction energy surfaces as a function of distance from the QM and Drude models with Methyphosphate (anionic) (MP\_1). Distances are labeled between the oxygen (O) on the model compound and hydrogen (H) on the water.

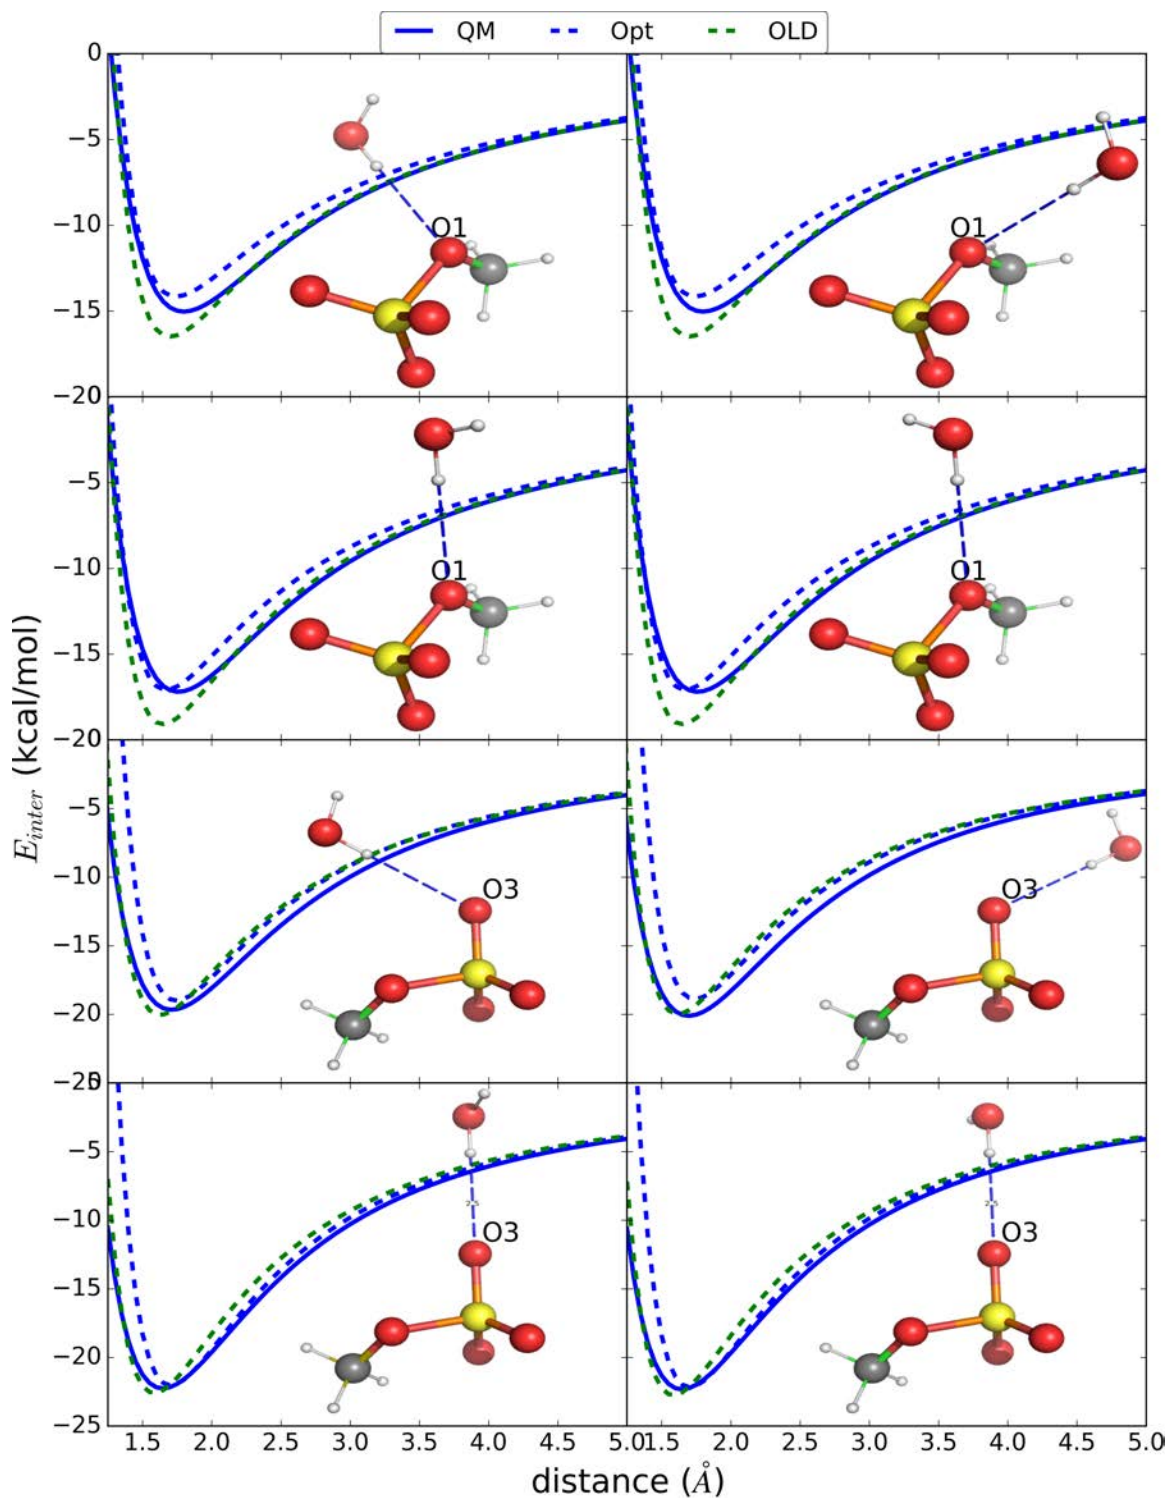

**Figure S2.** Water interaction energy surfaces as a function of distance from the QM and Drude models with Methyphosphate (dianionic)(MP\_2). Distances are labeled between the oxygen (O) on the model compound and hydrogen (H) on the water.

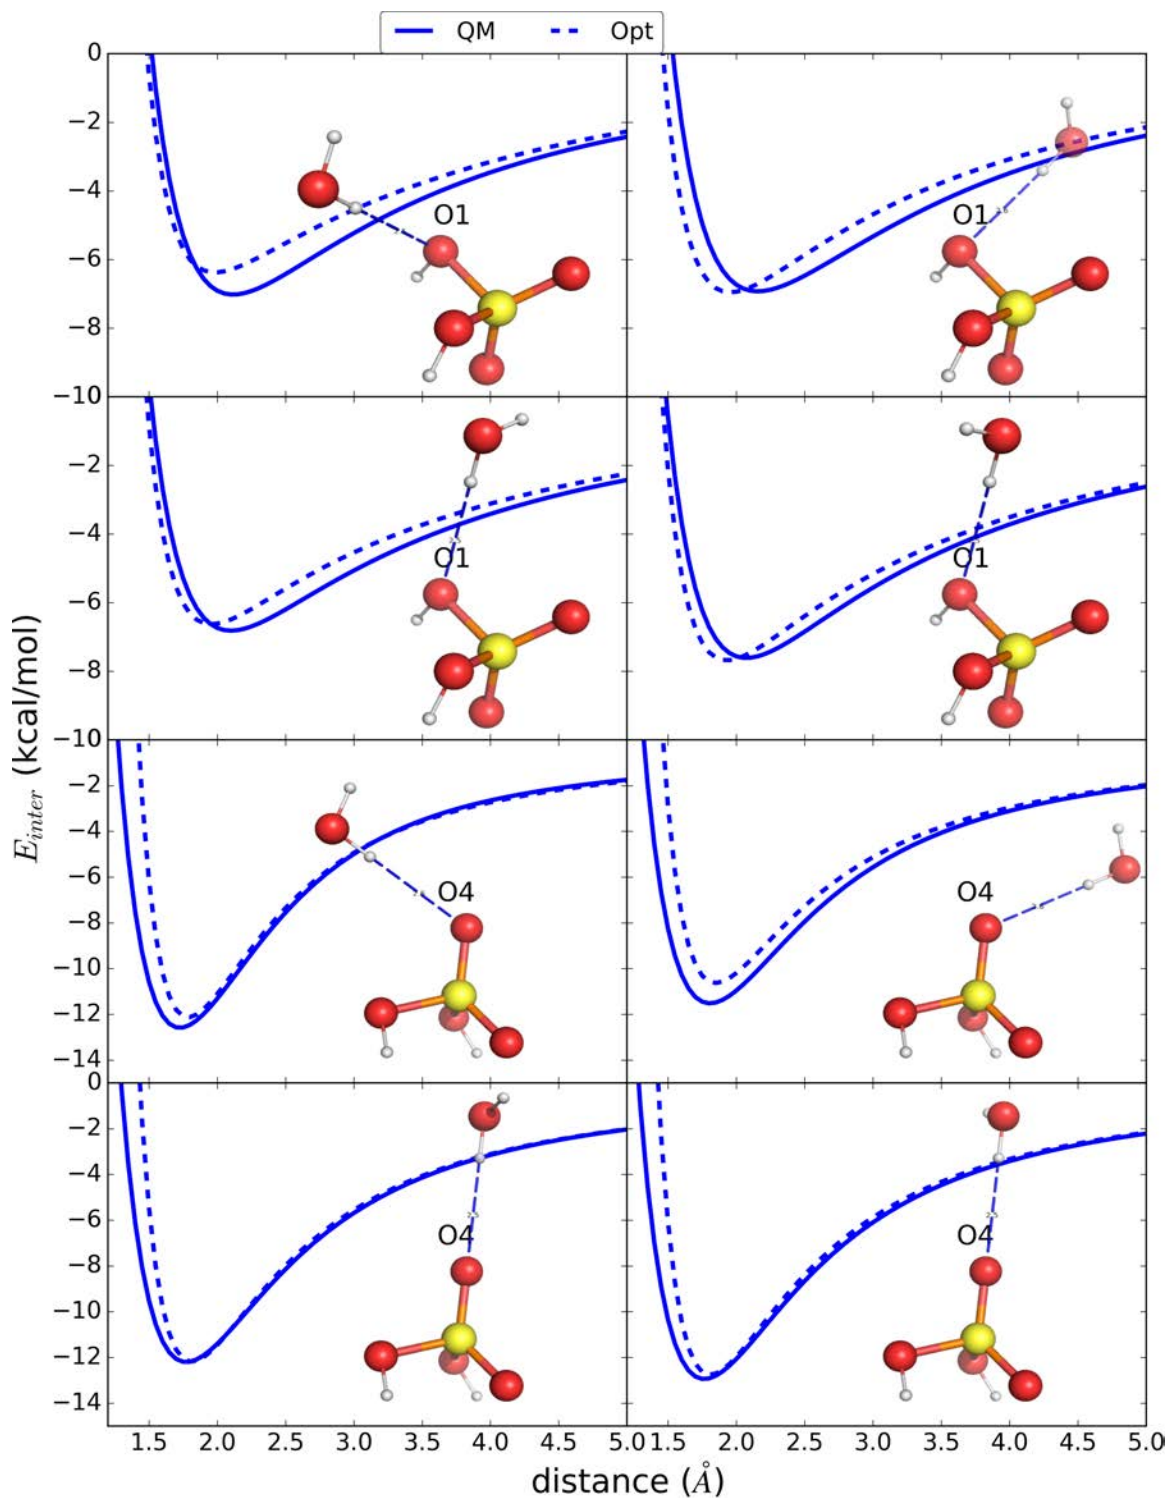

**Figure S3.** Water interaction energy surfaces as a function of distance from the QM and Drude models with Phosphate (anionic) (HP\_1). Distances are labeled between the oxygen (O) on the model compound and hydrogen (H) on the water.

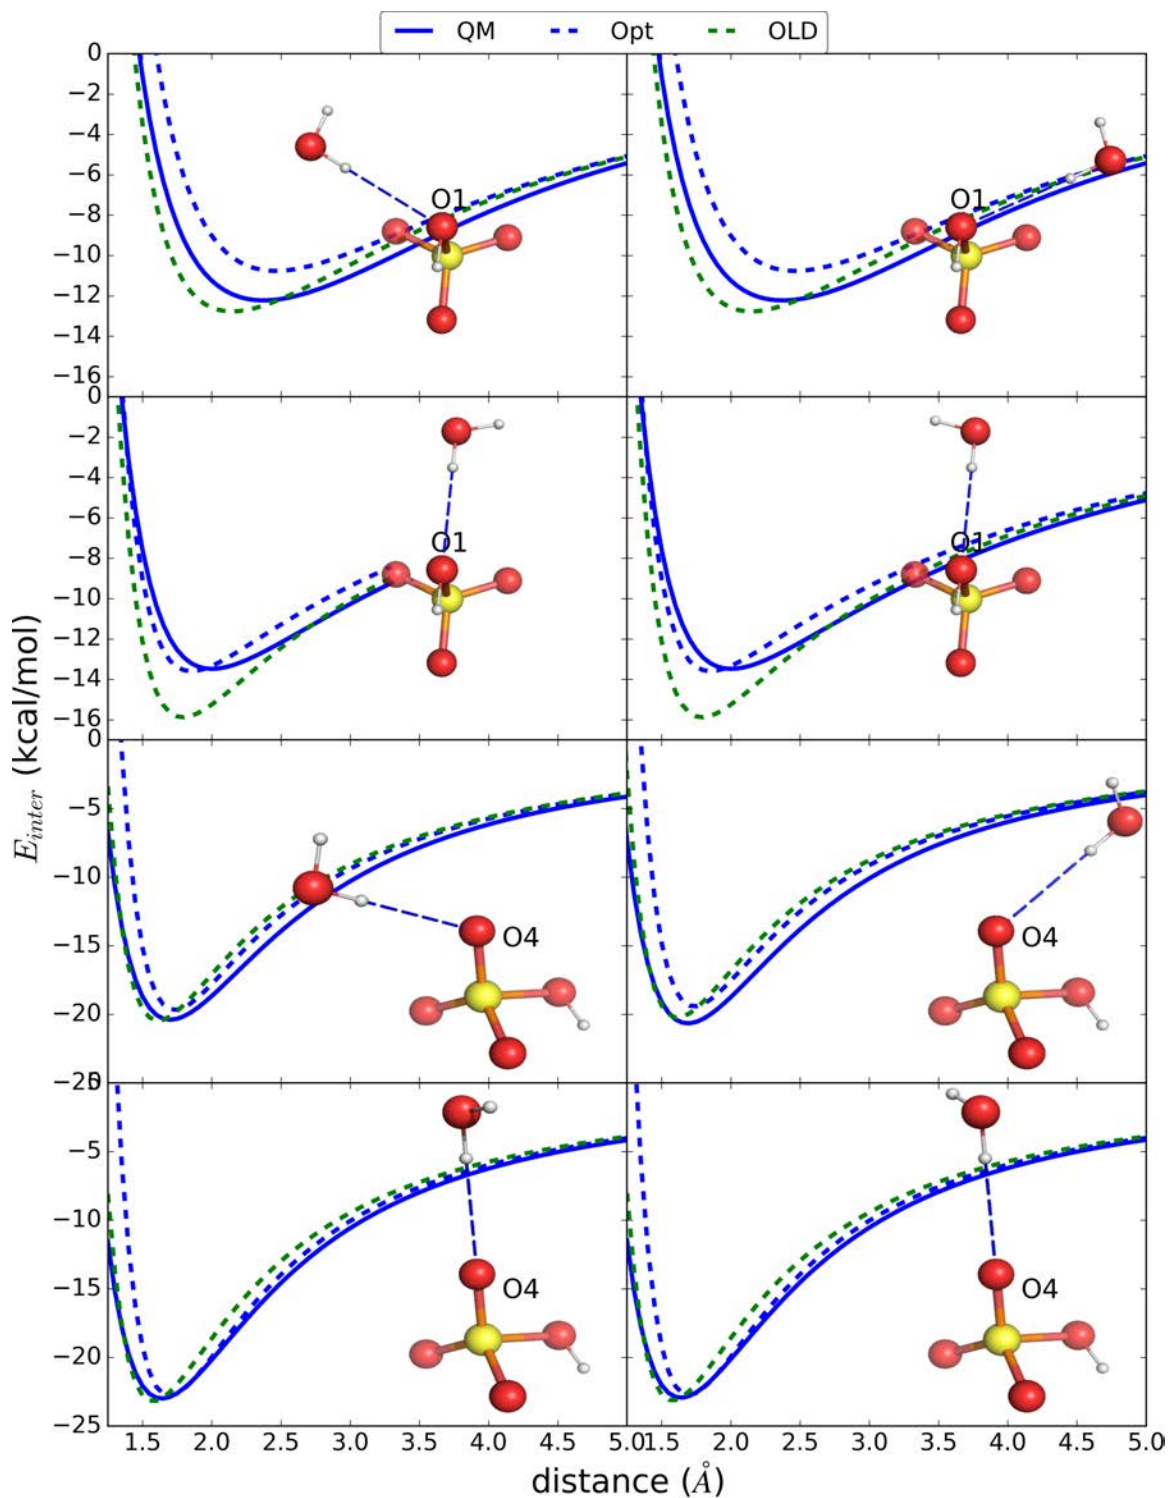

**Figure S4.** Water interaction energy surfaces as a function of distance from the QM and Drude models with Phosphate (dianionic) (HP\_2). Distances are labeled between the oxygen (O) on the model compound and hydrogen (H) on the water.

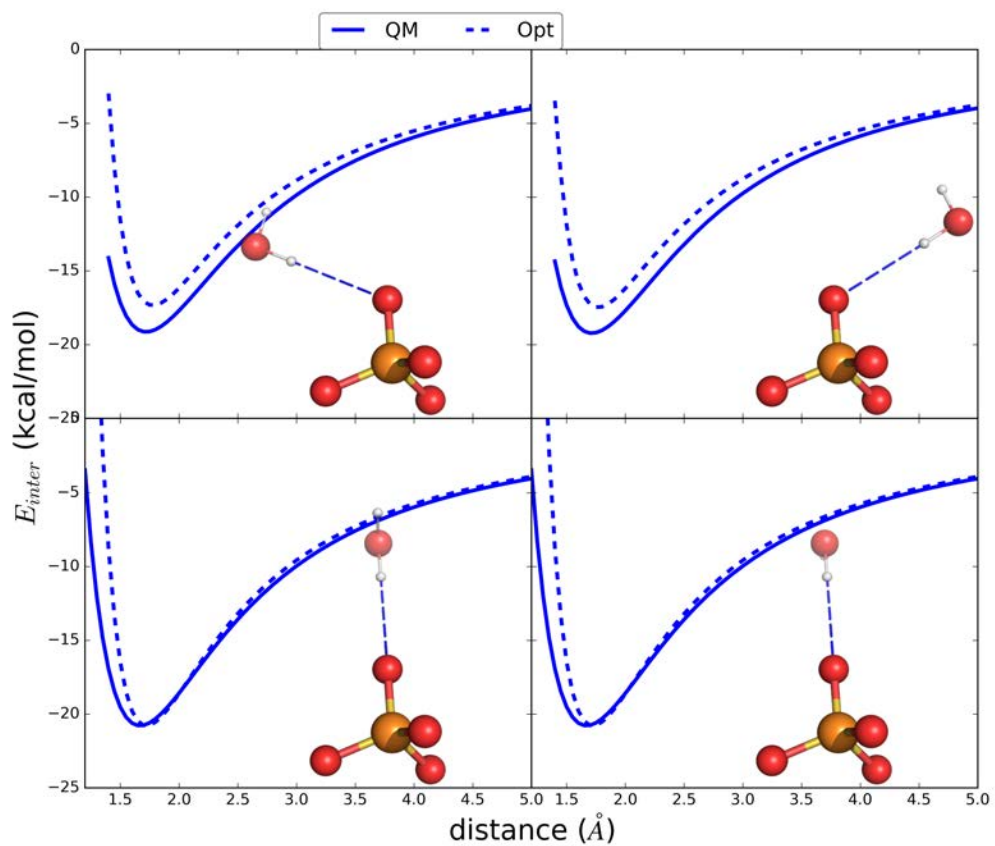

**Figure S5.** Water interaction energy surfaces as a function of distance from the QM and Drude models with the sulfate ion (SO<sub>4</sub>). Distances are labeled between the oxygen (O) on the model compound and hydrogen (H) on the water.

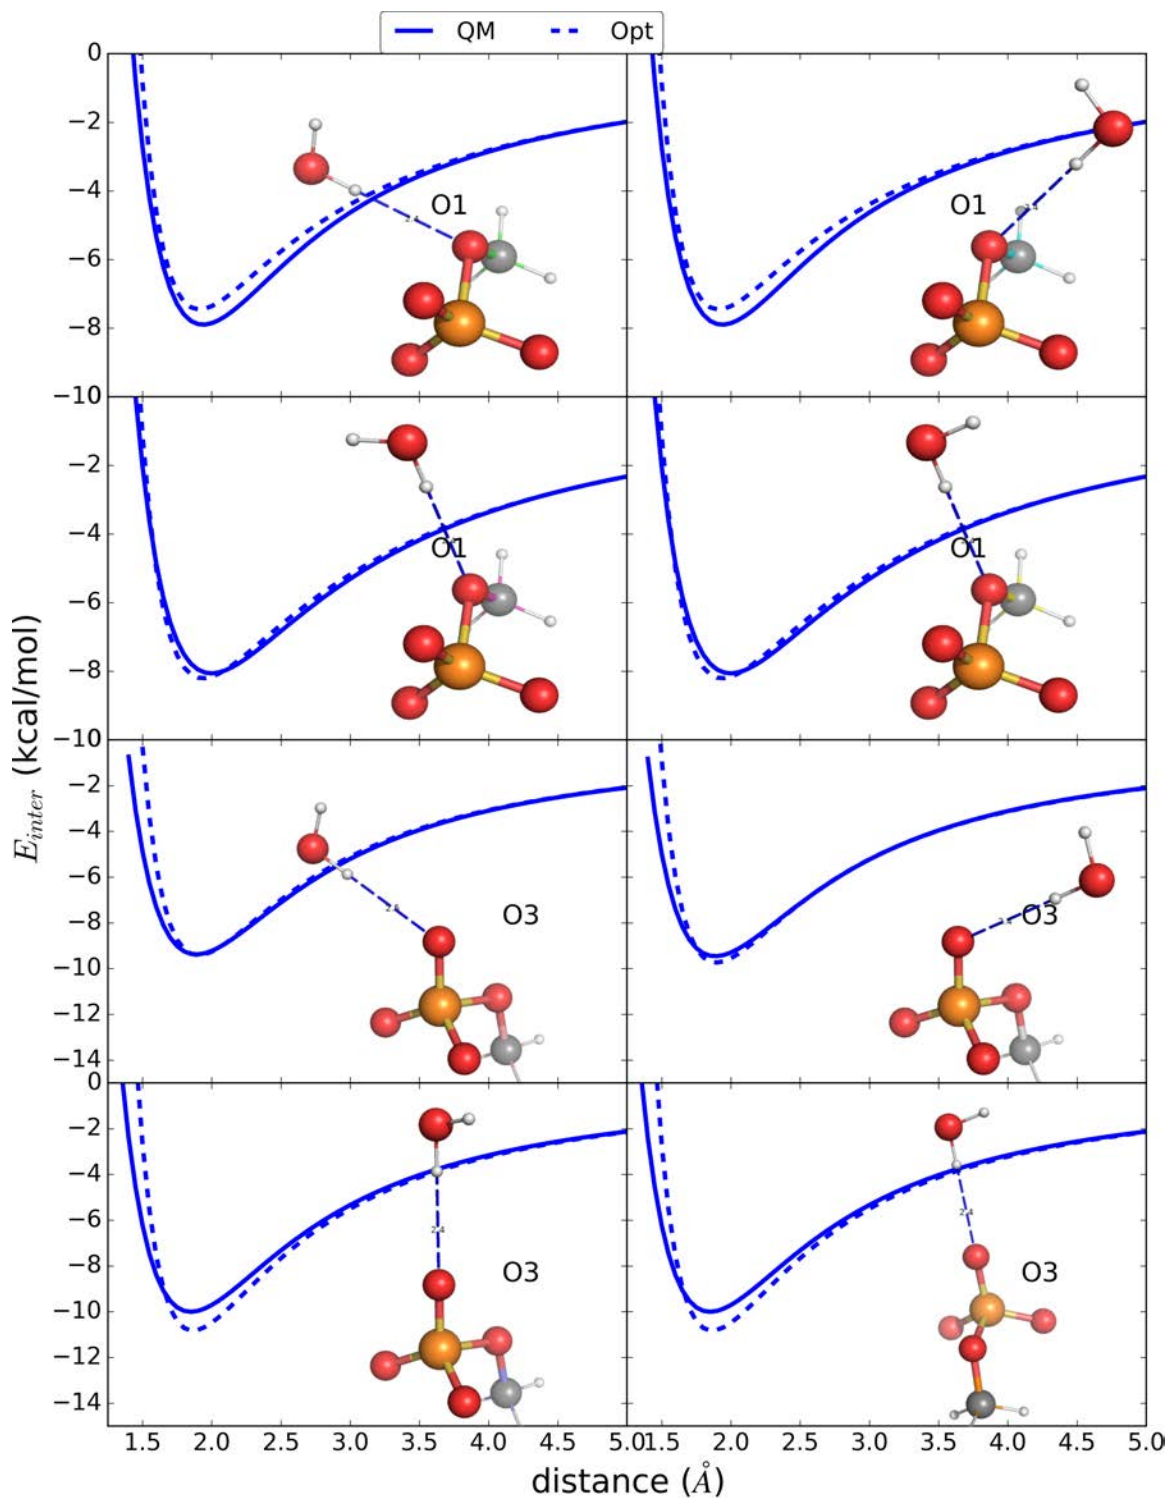

**Figure S6.** Water interaction energy surfaces as a function of distance from the QM and Drude models with Methylsulfate (anionic) (MSO<sub>4</sub>). Distances are labeled between the oxygen (O) on the model compound and hydrogen (H) on the water.

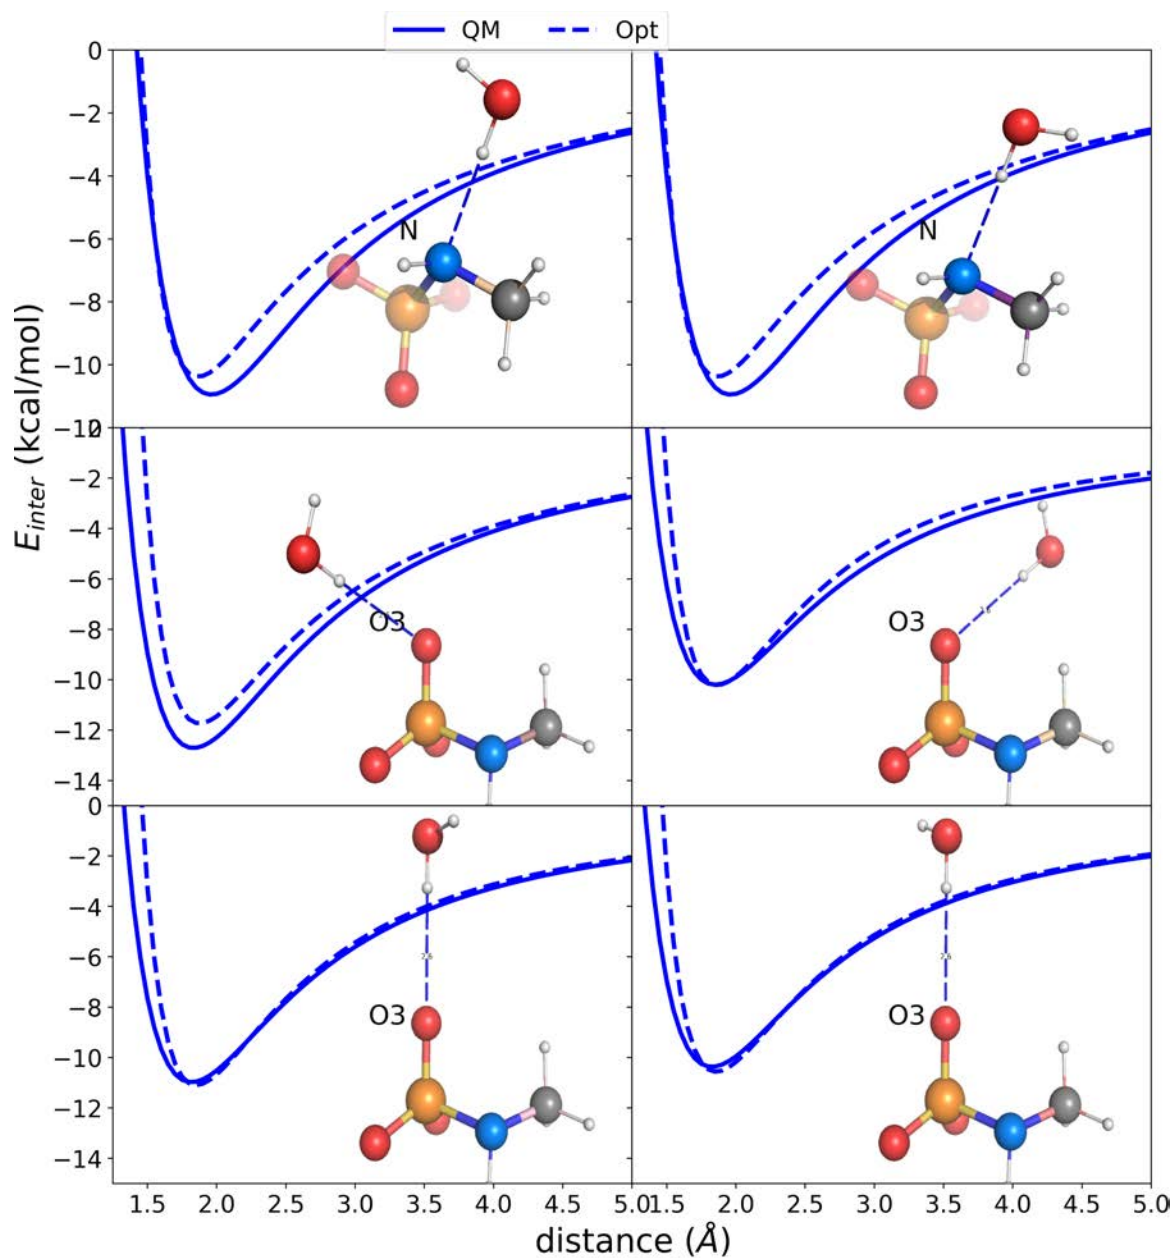

**Figure S7.** Water interaction energy surfaces as a function of distance from the QM and Drude models with N-methylsulfamate (anionic) (NMSM). Distances are labeled between the oxygen/Nitrogen (O/N) on the model compound and hydrogen (H) on the water.



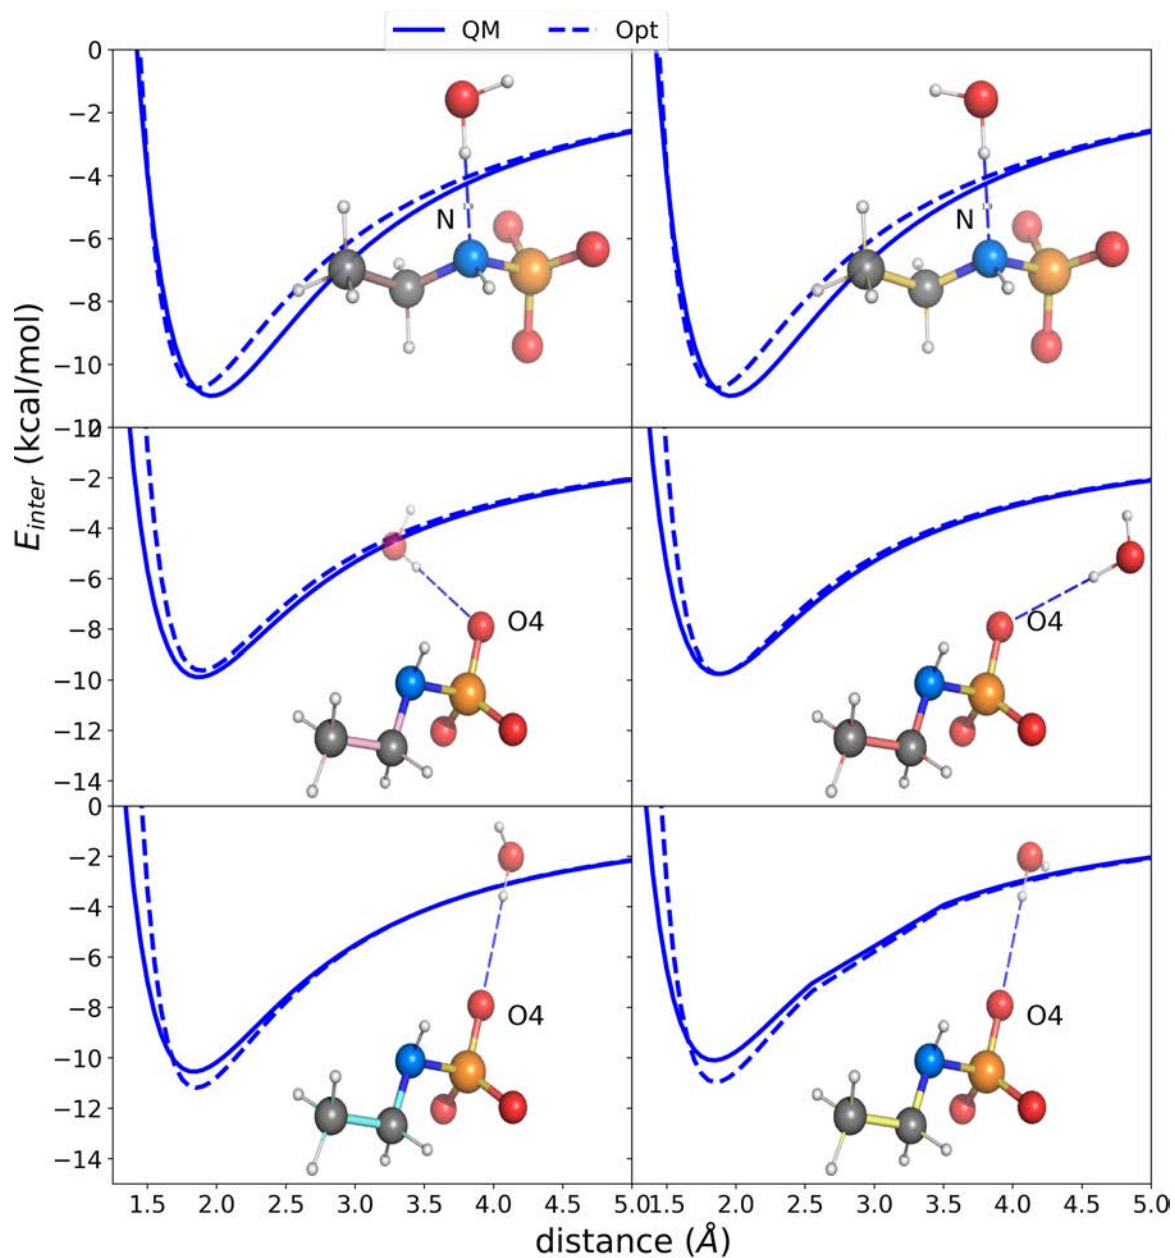

**Figure S8.** Water interaction energy surfaces as a function of distance from the QM and Drude models with N-ethylsulfamate (anionic) (NESM). Distances are labeled between the oxygen/Nitrogen (O/N) on the model compound and hydrogen (H) on the water.

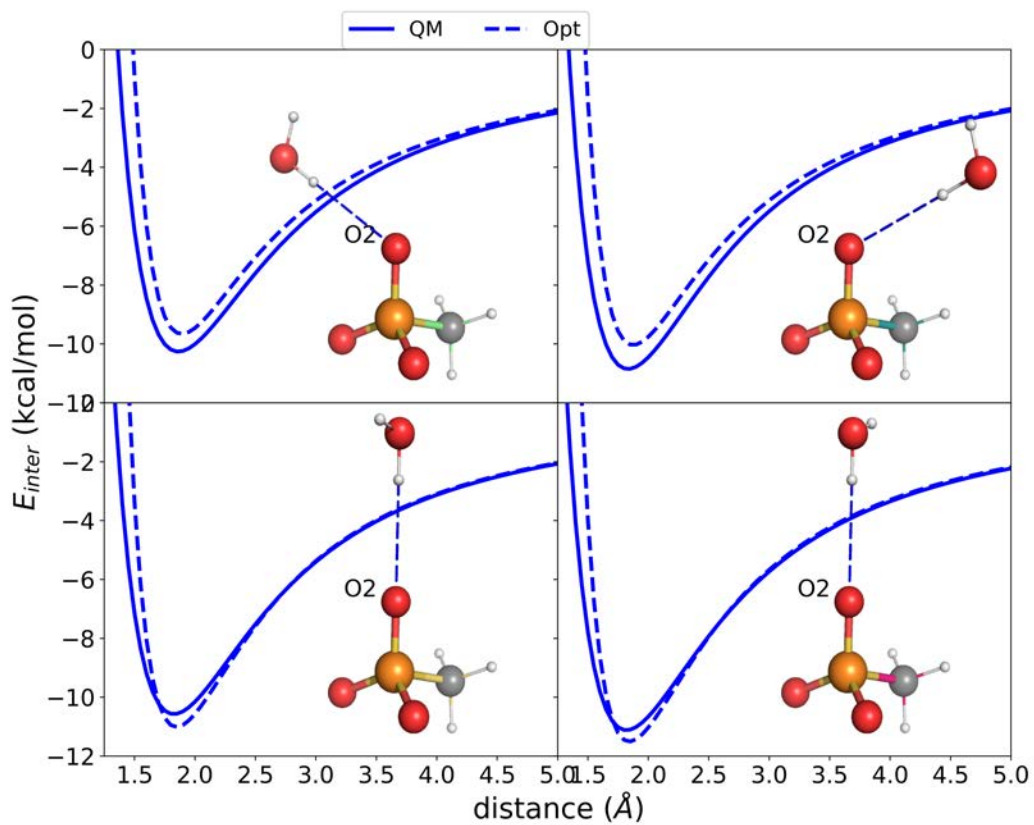

**Figure S9.** Water interaction energy surfaces as a function of distance from the QM and Drude models with Methylsulfonate (anionic) (MSNA). Distances are labeled between the oxygen (O) on the model compound and hydrogen (H) on the water.

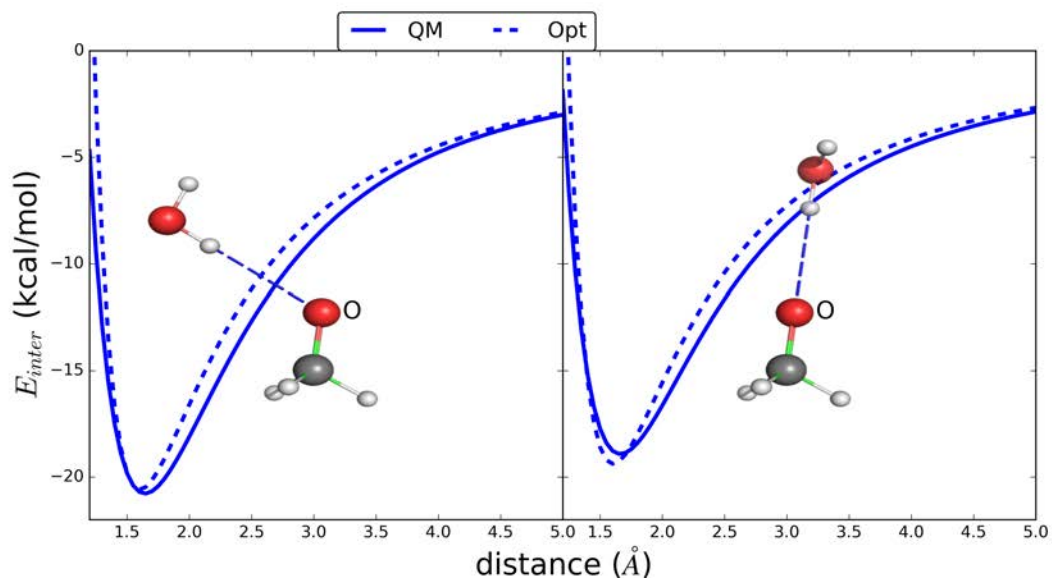

**Figure S10.** Water interaction energy surfaces as a function of distance from the QM and Drude models with Methoxide (anionic) (MEO). Distances are labeled between the oxygen (O) on the model compound and hydrogen (H) on the water.

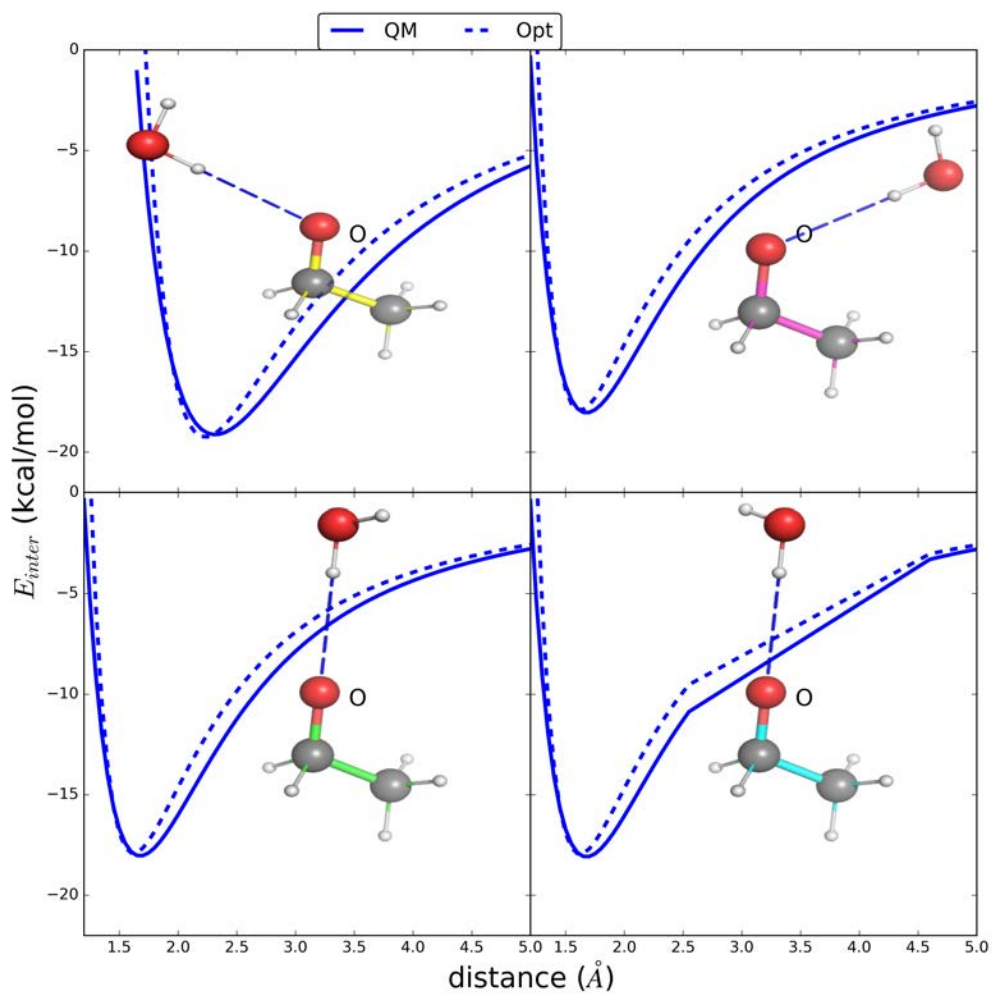

**Figure S11.** Water interaction energy surfaces as a function of distance from the QM and Drude models with Ethoxide (anionic) (ETO). Distances are labeled between the oxygen (O) on the model compound and hydrogen (H) on the water.

## Table S8. Polarizable Drude Force Field Topology File

```

* Drude toppar file for molecular anions
*
read rtf card append
* topology for molecular anions
*
41

DEFA FIRS NONE LAST NONE
AUTOGENERATE ANGLES DIHEDRALS DRUDE PATCH

RESI DMP          -1.000 ! dimethylphosphate, aak&aah, optimized for both lipids
GROUP            ! and nucleic acids
ATOM P          PD1AN   1.192  ALPHA -0.974  THOLE 2.098 !           H11
ATOM O13        OD2C2C -0.856  ALPHA -0.931  THOLE 1.083 !           |
ATOM O14        OD2C2C -0.856  ALPHA -0.931  THOLE 1.083 !       H12--C1--H13
ATOM O11        OD30BN -0.520  ALPHA -0.901  THOLE 0.181 !           |
ATOM O12        OD30BN -0.520  ALPHA -0.901  THOLE 0.181 !           O11
ATOM C1          CD33C   0.202  ALPHA -1.642  THOLE 0.862 !           |
ATOM H11        HDA3A   0.026                !       O14==P--O13(-)
ATOM H12        HDA3A   0.026                !           |
ATOM H13        HDA3A   0.026                !           O12
ATOM C2          CD33C   0.202  ALPHA -1.642  THOLE 0.862 !           |
ATOM H21        HDA3A   0.026                !       H22--C2--C23
ATOM H22        HDA3A   0.026                !           |
ATOM H23        HDA3A   0.026                !           H21

BOND P           O11     P           O12     P           O13     P           O14
BOND O11        C1      O12      C2
BOND C1         H11     C1      H12     C1      H13
BOND C2         H21     C2      H22     C2      H23

ANISOTROPY O11 O13 O12 O14 A11 1.0000 A22 0.6000
ANISOTROPY O12 O14 O11 O13 A11 1.0000 A22 0.6000
ANISOTROPY O13 P   O11 O12 A11 0.6000 A22 1.0000
ANISOTROPY O14 P   O12 O11 A11 0.6000 A22 1.0000

IC  O11 P   O12 C2      1.5837 102.73 72.47 116.87 1.4386
IC  O12 P   O11 C1      1.5843 102.73 72.47 116.85 1.4394
IC  O13 P   O11 C1      1.4910 107.70 -41.57 116.85 1.4394
IC  O14 P   O12 C2      1.4906 107.67 -41.56 116.87 1.4386
IC  H11 C1  O11 P        1.1128 110.79 -42.95 116.85 1.5837
IC  H12 C1  O11 P        1.1118 109.92 77.01 116.85 1.5837
IC  H13 C1  O11 P        1.1095 109.84 -163.26 116.85 1.5837
IC  H21 C2  O12 P        1.1125 110.79 -42.95 116.87 1.5843
IC  H22 C2  O12 P        1.1123 109.91 77.00 116.87 1.5843
IC  H23 C2  O12 P        1.1094 109.84 -163.30 116.87 1.5843
IC  O12 O11 *P O13      1.5843 102.73 -114.04 107.70 1.4910
IC  O12 O11 *P O14      1.5843 102.73 113.68 108.15 1.4906
IC  P   O11 C1 H11      1.5837 116.85 -42.95 110.79 1.1128
IC  H11 O11 *C1 H12     1.1128 110.79 119.96 109.92 1.1118
IC  H11 O11 *C1 H13     1.1128 110.79 -120.31 109.84 1.1095
IC  P   O12 C2 H21      1.5843 116.87 -42.95 110.79 1.1125
IC  H21 O12 *C2 H22     1.1125 110.79 119.95 109.91 1.1123
IC  H21 O12 *C2 H23     1.1125 110.79 -120.35 109.84 1.1094
patch first none last none

RESI MP_0          0.000 ! Methylphosphate, neutral
GROUP

```

```

ATOM C1  CD33C   0.242  ALPHA -1.642  THOLE 0.862  !           H11
ATOM O1  OD30D  -0.520  ALPHA -0.901  THOLE 0.811  !           |
ATOM P1  PD1AN   1.376  ALPHA -0.974  THOLE 2.098  !   H13--C1--H12
ATOM O2  OD31D   0.000  ALPHA -0.927  THOLE 1.100  !           |
ATOM LP2A LPDNA1 -0.253                                     !           O1
ATOM LP2B LPDNA1 -0.253                                     !           |
ATOM O3  OD31D   0.000  ALPHA -0.927  THOLE 1.100  !   04==P1--O3
ATOM LP3A LPDNA1 -0.253                                     !           |
ATOM LP3B LPDNA1 -0.253                                     !           O2 \ H3
ATOM O4  OD2C2C -0.776  ALPHA -0.921  THOLE 1.083  !           \
ATOM H11 HDA3A   0.026                                     !           H2
ATOM H12 HDA3A   0.026                                     !
ATOM H13 HDA3A   0.026                                     !
ATOM H2  HDP1A   0.306
ATOM H3  HDP1A   0.306

```

```

BOND P1  O1      P1  O2      P1  O3      P1  O4      O1  C1
BOND C1  H11     C1  H12     C1  H13     O2  H2      O3  H3
BOND O2  LP2A    O2  LP2B
BOND O3  LP3A    O3  LP3B

```

```

LONEPAIR relative LP2A O2 P1 H2 distance 0.35 angle 110.0 dihe 90.0
LONEPAIR relative LP2B O2 P1 H2 distance 0.35 angle 110.0 dihe 270.0
LONEPAIR relative LP3A O3 P1 H3 distance 0.35 angle 110.0 dihe 90.0
LONEPAIR relative LP3B O3 P1 H3 distance 0.35 angle 110.0 dihe 270.0
ANISOTROPY O2 P1 LP2A LP2B A11 0.76473 A22 1.16239
ANISOTROPY O3 P1 LP3A LP3B A11 0.76473 A22 1.16239

```

```

IC  H11  C1      O1      P1      0.0000  0.00 180.00  0.00 0.0000
IC  C1   O1      P1      O2      0.0000  0.00 180.00  0.00 0.0000
IC  H11  O1      *C1     H12     0.0000  0.00 120.00  0.00 0.0000
IC  H11  O1      *C1     H13     0.0000  0.00 -120.00  0.00 0.0000
IC  O2   O1      *P1     O3      0.0000  0.00 120.00  0.00 0.0000
IC  O2   O1      *P1     O4      0.0000  0.00 -120.00  0.00 0.0000
IC  O1   P1      O2      H2      0.0000  0.00 180.00  0.00 0.0000
IC  O1   P1      O3      H3      0.0000  0.00 180.00  0.00 0.0000

```

PATCH FIRST NONE LAST NONE

```

RESI MP_1      -1.000 ! Methylphosphate, anionic
GROUP          ! Villa et al., JPCB, 2018

```

```

ATOM C1  CD33C   0.182  ALPHA -1.642  THOLE 0.862  !           H11
ATOM O1  OD30D  -0.520  ALPHA -0.901  THOLE 0.811  !           |
ATOM P1  PD1AN   1.252  ALPHA -0.974  THOLE 2.098  !   H13--C1--H12
ATOM O2  OD31D   0.000  ALPHA -0.927  THOLE 1.100  !           |
ATOM LPA LPDNA1 -0.273                                     !           O1
ATOM LPB LPDNA1 -0.273                                     !           |
ATOM O3  OD2C2C -0.856  ALPHA -0.921  THOLE 1.083  !   04==P1--O3(-)
ATOM O4  OD2C2C -0.856  ALPHA -0.921  THOLE 1.083  !           |
ATOM H11 HDA3A   0.026                                     !           O2 \
ATOM H12 HDA3A   0.026                                     !           H2
ATOM H13 HDA3A   0.026                                     !
ATOM H2  HDP1A   0.266

```

```

BOND P1  O2      P1  O3      P1  O4
BOND O1  P1      O1  C1
BOND O2  H2
BOND C1  H11     C1  H12     C1  H13
BOND O2  LPA     O2  LPB

```

```

LONEPAIR relative LPA O2 P1 H2 distance 0.35 angle 110.00 dihe 90.00
LONEPAIR relative LPB O2 P1 H2 distance 0.35 angle 110.00 dihe 270.00
ANISOTROPY O2 P1 LPA LPB A11 0.76473 A22 1.16239
PATCH FIRST NONE LAST NONE

```

|    |     |    |     |     |        |      |        |      |        |
|----|-----|----|-----|-----|--------|------|--------|------|--------|
| IC | H11 | C1 | 01  | P1  | 0.0000 | 0.00 | 180.00 | 0.00 | 0.0000 |
| IC | C1  | 01 | P1  | 02  | 0.0000 | 0.00 | 180.00 | 0.00 | 0.0000 |
| IC | 01  | P1 | 02  | H2  | 0.0000 | 0.00 | 180.00 | 0.00 | 0.0000 |
| IC | 02  | 01 | *P1 | 03  | 0.0000 | 0.00 | 90.00  | 0.00 | 0.0000 |
| IC | 02  | 01 | *P1 | 04  | 0.0000 | 0.00 | 180.00 | 0.00 | 0.0000 |
| IC | H11 | 01 | *C1 | H12 | 0.0000 | 0.00 | 90.00  | 0.00 | 0.0000 |
| IC | H11 | 01 | *C1 | H13 | 0.0000 | 0.00 | 180.00 | 0.00 | 0.0000 |

PATCH FIRST NONE LAST NONE

RESI MP\_2 -2.000 ! Methylphosphate, dianionic  
GROUP ! Villa et al., JPCB, 2018

|      |     |        |        |       |        |       |       |   |               |
|------|-----|--------|--------|-------|--------|-------|-------|---|---------------|
| ATOM | C1  | CD33C  | 0.161  | ALPHA | -1.642 | THOLE | 0.862 | ! | H11           |
| ATOM | 01  | OD30D  | -0.740 | ALPHA | -0.901 | THOLE | 0.181 | ! |               |
| ATOM | P1  | PD1AN  | 1.792  | ALPHA | -0.974 | THOLE | 2.098 | ! | H13--C1--H12  |
| ATOM | 02  | OD2C2C | -1.087 | ALPHA | -0.931 | THOLE | 1.083 | ! |               |
| ATOM | 03  | OD2C2C | -1.087 | ALPHA | -0.931 | THOLE | 1.083 | ! | 01            |
| ATOM | 04  | OD2C2C | -1.087 | ALPHA | -0.931 | THOLE | 1.083 | ! |               |
| ATOM | H11 | HDA3A  | 0.016  |       |        |       |       | ! | 04==P1--03(-) |
| ATOM | H12 | HDA3A  | 0.016  |       |        |       |       | ! |               |
| ATOM | H13 | HDA3A  | 0.016  |       |        |       |       | ! | 02(-)         |

|      |    |     |    |     |    |     |
|------|----|-----|----|-----|----|-----|
| BOND | 01 | P1  | 01 | C1  |    |     |
| BOND | P1 | 02  | P1 | 03  | P1 | 04  |
| BOND | C1 | H11 | C1 | H12 | C1 | H13 |

|    |     |    |     |     |        |      |        |      |        |
|----|-----|----|-----|-----|--------|------|--------|------|--------|
| IC | H11 | C1 | 01  | P1  | 0.0000 | 0.00 | 180.00 | 0.00 | 0.0000 |
| IC | C1  | 01 | P1  | 02  | 0.0000 | 0.00 | 180.00 | 0.00 | 0.0000 |
| IC | 02  | 01 | *P1 | 03  | 0.0000 | 0.00 | 90.00  | 0.00 | 0.0000 |
| IC | 02  | 01 | *P1 | 04  | 0.0000 | 0.00 | 180.00 | 0.00 | 0.0000 |
| IC | H11 | 01 | *C1 | H12 | 0.0000 | 0.00 | 90.00  | 0.00 | 0.0000 |
| IC | H11 | 01 | *C1 | H13 | 0.0000 | 0.00 | 180.00 | 0.00 | 0.0000 |

PATCH FIRST NONE LAST NONE

RESI HP\_0 0.000 ! Hydrogenphosphate, neutral  
GROUP

|      |    |        |        |       |        |       |       |   |            |
|------|----|--------|--------|-------|--------|-------|-------|---|------------|
| ATOM | P1 | PD1AN  | 0.827  | ALPHA | -1.244 | THOLE | 1.678 | ! | H1         |
| ATOM | 04 | OD2C2C | -0.590 | ALPHA | -0.951 | THOLE | 1.083 | ! | /          |
| ATOM | 01 | OD31D  | -0.445 | ALPHA | -0.929 | THOLE | 1.091 | ! | 01         |
| ATOM | 02 | OD31D  | -0.445 | ALPHA | -0.929 | THOLE | 1.091 | ! |            |
| ATOM | 03 | OD31D  | -0.445 | ALPHA | -0.929 | THOLE | 1.091 | ! | 04==P1--03 |
| ATOM | H1 | HDP1A  | 0.366  |       |        |       |       | ! |            |
| ATOM | H2 | HDP1A  | 0.366  |       |        |       |       | ! | 02 \ H3    |
| ATOM | H3 | HDP1A  | 0.366  |       |        |       |       | ! | /          |
|      |    |        |        |       |        |       |       | ! | H2         |

|      |    |    |    |    |    |    |    |    |
|------|----|----|----|----|----|----|----|----|
| BOND | P1 | 01 | P1 | 02 | P1 | 03 | P1 | 04 |
| BOND | 01 | H1 | 02 | H2 | 03 | H3 |    |    |

|       |       |      |      |      |        |      |        |      |        |
|-------|-------|------|------|------|--------|------|--------|------|--------|
| PATCH | FIRST | NONE | LAST | NONE |        |      |        |      |        |
| IC    | H1    | 01   | P1   | 02   | 0.0000 | 0.00 | 180.00 | 0.00 | 0.0000 |
| IC    | 02    | P2   | 03   | H3   | 0.0000 | 0.00 | 180.00 | 0.00 | 0.0000 |
| IC    | H3    | 03   | P1   | 02   | 0.0000 | 0.00 | 180.00 | 0.00 | 0.0000 |
| IC    | 02    | 01   | *P1  | 03   | 0.0000 | 0.00 | 90.00  | 0.00 | 0.0000 |
| IC    | 01    | 02   | *P1  | 04   | 0.0000 | 0.00 | 180.00 | 0.00 | 0.0000 |

PATCH FIRST NONE LAST NONE

RESI HP\_1 -1.000 ! Hydrogenphosphate, anionic  
GROUP

|      |      |        |        |       |        |       |       |   |               |
|------|------|--------|--------|-------|--------|-------|-------|---|---------------|
| ATOM | P1   | PD1AN  | 1.220  | ALPHA | -1.244 | THOLE | 1.678 | ! | H1            |
| ATOM | 03   | OD2C2C | -0.856 | ALPHA | -0.951 | THOLE | 1.083 | ! | /             |
| ATOM | 04   | OD2C2C | -0.856 | ALPHA | -0.951 | THOLE | 1.083 | ! | 01            |
| ATOM | 01   | OD31D  | 0.000  | ALPHA | -1.291 | THOLE | 1.091 | ! |               |
| ATOM | 02   | OD31D  | 0.000  | ALPHA | -1.291 | THOLE | 1.091 | ! | 04==P1--03(-) |
| ATOM | LP1A | LPDNA1 | -0.253 |       |        |       |       | ! |               |
| ATOM | LP1B | LPDNA1 | -0.253 |       |        |       |       | ! | 02            |

ATOM LP2A LPDNA1 -0.253 ! /  
ATOM LP2B LPDNA1 -0.253 ! H2  
ATOM H1 HDP1A 0.252 !  
ATOM H2 HDP1A 0.252 !

BOND P1 O1 P1 O2 P1 O3 P1 O4  
BOND O1 H1 O1 LP1A O1 LP1B  
BOND O2 H2 O2 LP2A O2 LP2B

LONEPAIR relative LP1A O1 P1 H1 distance 0.35 angle 110.00 dihe 90.00  
LONEPAIR relative LP1B O1 P1 H1 distance 0.35 angle 110.00 dihe 270.00  
ANISOTROPY O1 P1 LP1A LP1B A11 0.76473 A22 1.16239

LONEPAIR relative LP2A O2 P1 H2 distance 0.35 angle 110.00 dihe 90.00  
LONEPAIR relative LP2B O2 P1 H2 distance 0.35 angle 110.00 dihe 270.00  
ANISOTROPY O2 P1 LP2A LP2B A11 0.76473 A22 1.16239

IC H1 O1 P1 O3 0.0000 0.00 180.00 0.00 0.0000  
IC H2 O2 P1 O3 0.0000 0.00 180.00 0.00 0.0000  
IC O2 O1 \*P1 O3 0.0000 0.00 90.00 0.00 0.0000  
IC O1 O2 \*P1 O4 0.0000 0.00 180.00 0.00 0.0000

PATCH FIRST NONE LAST NONE

RESI HP\_2 -2.000 ! Hydrogenphosphate, dianionic

GROUP

ATOM O1 OD31D -0.000 ALPHA -1.291 THOLE 1.091 ! H  
ATOM P1 PD1AN 1.730 ALPHA -1.244 THOLE 1.678 ! /  
ATOM O2 OD2C2C -1.087 ALPHA -0.951 THOLE 1.083 ! O1  
ATOM O3 OD2C2C -1.087 ALPHA -0.951 THOLE 1.083 ! |  
ATOM O4 OD2C2C -1.087 ALPHA -0.951 THOLE 1.083 ! 04==P1--O3(-)  
ATOM LPA LPDNA1 -0.345 ! |  
ATOM LPB LPDNA1 -0.345 ! O2(-)  
ATOM H HDP1A 0.221 !

BOND P1 O1 P1 O2 P1 O3 P1 O4  
BOND O1 H O1 LPA O1 LPB

LONEPAIR relative LPA O1 P1 H distance 0.35 angle 110.00 dihe 90.00  
LONEPAIR relative LPB O1 P1 H distance 0.35 angle 110.00 dihe 270.00  
!ANISOTROPY O1 P1 LPA LPB A11 0.76473 A22 1.16239 ! need to check on this

IC H O1 P1 O2 1.0000 109.00 179.00 109.00 1.6000  
IC O2 O1 \*P1 O3 1.60000 109.00 90.00 109.00 1.60000  
IC O1 O2 \*P1 O4 1.60000 109.00 179.00 109.00 1.60000

PATCH FIRST NONE LAST NONE

RESI S04 -2.000 ! Sulfate ion

GROUP

ATOM S SD1A 2.000 ALPHA -0.930 THOLE 1.098 ! OS2(-1)  
ATOM OS1 OD2C2C -1.000 ALPHA -0.990 THOLE 1.083 ! |  
ATOM OS2 OD2C2C -1.000 ALPHA -0.990 THOLE 1.083 ! (-1) OS2--S(+2)--OS4 (-1)  
ATOM OS3 OD2C2C -1.000 ALPHA -0.990 THOLE 1.083 ! ||  
ATOM OS4 OD2C2C -1.000 ALPHA -0.990 THOLE 1.083 ! OS1

BOND S OS1 S OS2 S OS3 S OS4

RESI MS04 -1.000 ! Methylsulfate

GROUP

ATOM S SD1A 1.330 ALPHA -0.930 THOLE 1.098 ! OS2(-1)  
ATOM OS1 OD30B -0.560 ALPHA -0.670 THOLE 0.181 ! |  
ATOM OS2 OD2C2C -0.706 ALPHA -0.990 THOLE 1.083 ! (-1) OS2--S(+2)--OS4 (-1)  
ATOM OS3 OD2C2C -0.706 ALPHA -0.990 THOLE 1.083 ! |  
ATOM OS4 OD2C2C -0.706 ALPHA -0.990 THOLE 1.083 ! OS1  
ATOM C1 CD33C 0.240 ALPHA -1.642 THOLE 0.862 ! \

```

ATOM H11 HDA3A 0.036 ! H11-C1-H13
ATOM H12 HDA3A 0.036 ! |
ATOM H13 HDA3A 0.036 ! H12

```

```

BOND S OS1 S OS2 S OS3 S OS4 OS1 C1
BOND C1 H11 C1 H12 C1 H13

```

```

ACCE OS1
ACCE OS2
ACCE OS3
ACCE OS4

```

```

IC H11 C1 OS1 S 0.0000 0.00 180.00 0.00 0.0000
IC C1 OS1 S OS2 0.0000 0.00 180.00 0.00 0.0000
IC OS2 OS1 *S OS3 0.0000 0.00 90.00 0.00 0.0000
IC OS2 OS1 *S OS4 0.0000 0.00 180.00 0.00 0.0000
IC H11 OS1 *C1 H12 0.0000 0.00 90.00 0.00 0.0000
IC H11 OS1 *C1 H13 0.0000 0.00 180.00 0.00 0.0000

```

```

RESI MSNA -1.000 ! Methylsulfonate
GROUP

```

```

ATOM S SD1A 1.219 ALPHA -0.930 THOLE 1.098 ! OS2(-1)
ATOM OS1 OD2C2C -0.706 ALPHA -0.990 THOLE 1.083 ! |
ATOM OS2 OD2C2C -0.706 ALPHA -0.990 THOLE 1.083 ! (-1) OS2--S(+2)--OS4 (-1)
ATOM OS3 OD2C2C -0.706 ALPHA -0.990 THOLE 1.083 ! |
ATOM C1 CD33C -0.209 ALPHA -1.642 THOLE 0.862 ! H11-C1-H13
ATOM H11 HDA3A 0.036 ! |
ATOM H12 HDA3A 0.036 ! H12
ATOM H13 HDA3A 0.036 !

```

```

BOND S OS1 S OS2 S OS3 S C1
BOND C1 H11 C1 H12 C1 H13

```

```

ACCE OS1
ACCE OS2
ACCE OS3

```

```

RESI NMSM -1.000 ! N-methyl sulfamate
GROUP

```

```

ATOM C1 CD33C 0.260 ALPHA -1.642 THOLE 0.862 ! H11
ATOM S SD1A 1.504 ALPHA -0.930 THOLE 1.098 ! |
ATOM OS2 OD2C2C -0.780 ALPHA -0.990 THOLE 1.083 ! H13-C1-H12
ATOM OS3 OD2C2C -0.780 ALPHA -0.990 THOLE 1.083 ! |
ATOM OS4 OD2C2C -0.780 ALPHA -0.990 THOLE 1.083 ! N-HN
ATOM N ND2A2 -0.782 ALPHA -1.942 THOLE 0.250 ! |
ATOM HN HDP1A 0.280 ! OS3==S==OS4
ATOM H11 HDA3A 0.026 ! |
ATOM H12 HDA3A 0.026 ! OS2(-)
ATOM H13 HDA3A 0.026 !

```

```

BOND N C1 N S N HN
BOND S OS2 S OS3 S OS4
BOND C1 H11 C1 H12 C1 H13

```

```

IC OS3 S N C1 1.5109 120.35 -58.37 106.61 1.4455
IC OS4 S N C1 2.4267 38.58 108.63 109.00 1.4111
IC OS2 S N C1 2.4267 38.58 -115.20 116.51 1.4439
IC C1 S *N HN 2.6812 29.10 -125.97 104.18 1.0300
IC H11 C1 N S 0.0000 000.00 0.0 000.00 0.0000
IC H12 C1 N S 0.0000 000.00 120.0 000.00 0.0000
IC H13 C1 N S 0.0000 000.00 -120.0 000.00 0.0000

```

```

RESI NESM -1.000 ! N-Ethyl sulfamate
GROUP

```



|          |        |        |       |        |       |       |   |             |
|----------|--------|--------|-------|--------|-------|-------|---|-------------|
| ATOM C1  | CD32C  | 0.240  | ALPHA | -1.642 | THOLE | 0.862 | ! | H23         |
| ATOM S   | SD1A   | 1.564  | ALPHA | -0.930 | THOLE | 1.098 | ! |             |
| ATOM OS2 | OD2C2C | -0.780 | ALPHA | -0.990 | THOLE | 1.083 | ! | C21-C2-C22  |
| ATOM OS3 | OD2C2C | -0.780 | ALPHA | -0.990 | THOLE | 1.083 | ! |             |
| ATOM OS4 | OD2C2C | -0.780 | ALPHA | -0.990 | THOLE | 1.083 | ! | C11-C1-C12  |
| ATOM N   | ND2A2  | -0.782 | ALPHA | -1.942 | THOLE | 0.250 | ! |             |
| ATOM HN  | HDP1A  | 0.280  |       |        |       |       | ! | N-HN        |
| ATOM H11 | HDA2A  | 0.026  |       |        |       |       | ! |             |
| ATOM H12 | HDA2A  | 0.026  |       |        |       |       | ! | OS3==S==OS4 |
| ATOM C2  | CD33C  | -0.092 | ALPHA | -1.642 | THOLE | 0.862 | ! |             |
| ATOM H21 | HDA3A  | 0.026  |       |        |       |       | ! | OS2(-)      |
| ATOM H22 | HDA3A  | 0.026  |       |        |       |       | ! |             |
| ATOM H23 | HDA3A  | 0.026  |       |        |       |       | ! |             |

BOND N C1 N S N HN  
 BOND S OS2 S OS3 S OS4  
 BOND C1 C2 C1 H11 C1 H12  
 BOND C2 H21 C2 H22 C2 H23

|        |     |     |     |        |      |        |      |        |
|--------|-----|-----|-----|--------|------|--------|------|--------|
| IC S   | N   | C1  | H11 | 0.0000 | 0.00 | -60.42 | 0.00 | 0.0000 |
| IC N   | H11 | *C1 | H12 | 0.0000 | 0.00 | 117.9  | 0.00 | 0.0000 |
| IC N   | H11 | *C1 | C2  | 0.0000 | 0.00 | -126.1 | 0.00 | 0.0000 |
| IC H11 | C1  | N   | H21 | 0.0000 | 0.00 | -176.0 | 0.00 | 0.0000 |
| IC C1  | N   | S   | O11 | 0.0000 | 0.00 | -51.92 | 0.00 | 0.0000 |
| IC N   | O11 | *S  | O12 | 0.0000 | 0.00 | -112.5 | 0.00 | 0.0000 |
| IC N   | O11 | *S  | O13 | 0.0000 | 0.00 | 110.8  | 0.00 | 0.0000 |
| IC N   | C1  | C2  | H21 | 0.0000 | 0.00 | -58.51 | 0.00 | 0.0000 |
| IC C1  | H21 | *C2 | H22 | 0.0000 | 0.00 | 122.1  | 0.00 | 0.0000 |
| IC C1  | H21 | *C2 | H23 | 0.0000 | 0.00 | -120.4 | 0.00 | 0.0000 |

RESI MEO -1.000 ! Methoxide  
 GROUP  
 ATOM C CD33A -0.305 ALPHA -1.854 THOLE 1.224 ! O(-)  
 ATOM O OD30E -0.680 ALPHA -1.041 THOLE 0.347 ! |  
 ATOM H1 HDA3A -0.005 ! H1-C-H2  
 ATOM H2 HDA3A -0.005 ! |  
 ATOM H3 HDA3A -0.005 ! H3

BOND C O C H1 C H2 C H3

RESI ETO -1.000 ! Ethoxide  
 GROUP  
 ATOM C1 CD32A -0.200 ALPHA -1.854 THOLE 1.224 ! O(-)  
 ATOM O OD30E -0.640 ALPHA -1.041 THOLE 0.347 ! |  
 ATOM H11 HDA2A -0.030 ! H11-C1-H12  
 ATOM H12 HDA2A -0.030 ! |  
 ATOM C2 CD33A -0.190 ALPHA -1.854 THOLE 1.224 ! H21-C2-H22  
 ATOM H21 HDA3A 0.030 ! |  
 ATOM H22 HDA3A 0.030 ! H23  
 ATOM H23 HDA3A 0.030 !

BOND C1 O C1 C2  
 BOND C1 H11 C1 H12  
 BOND C2 H21 C2 H22 C2 H23

END

read param card append  
 \* parameters for molecular anions  
 \*

BONDS  
 OD2C2C SD1A 525.00 1.493  
 OD30B SD1A 240.00 1.701

|       |       |        |       |
|-------|-------|--------|-------|
| CD33A | OD30E | 480.00 | 1.345 |
| OD30E | CD32A | 396.00 | 1.425 |
| SD1A  | ND2A2 | 185.00 | 1.700 |
| SD1A  | CD33C | 218.00 | 1.823 |

ANGLES

|        |        |        |       |        |       |        |
|--------|--------|--------|-------|--------|-------|--------|
| OD2C2C | SD1A   | OD2C2C | 60.00 | 115.35 |       |        |
| OD2C2C | SD1A   | OD30B  | 90.00 | 98.44  |       |        |
| SD1A   | OD30B  | CD33C  | 40.00 | 109.00 |       |        |
| OD30B  | SD1A   | OD30B  | 40.00 | 109.00 |       |        |
| OD30E  | CD33A  | HDA3A  | 61.00 | 117.20 |       |        |
| OD30E  | CD32A  | CD33A  | 66.00 | 112.50 |       |        |
| OD30E  | CD32A  | HDA2A  | 54.00 | 111.50 |       |        |
| CD2R6A | CD2R6A | CD2R6I | 50.00 | 118.20 |       |        |
| CD2R6A | CD2R6I | OD30E  | 55.20 | 127.80 |       |        |
| CD2R6A | CD2R6I | CD2R6A | 50.00 | 111.50 |       |        |
| CD2R6I | CD2R6A | HDR6A  | 30.00 | 116.55 |       |        |
| SD1A   | ND2A2  | HDP1A  | 48.00 | 118.00 |       |        |
| CD33C  | ND2A2  | SD1A   | 40.00 | 109.00 |       |        |
| ND2A2  | CD32C  | CD33C  | 50.00 | 109.00 |       |        |
| OD2C2C | SD1A   | ND2A2  | 50.00 | 113.00 |       |        |
| CD32C  | ND2A2  | SD1A   | 40.00 | 109.00 |       |        |
| CD32C  | CD33C  | HDA3A  | 34.60 | 110.10 | 22.53 | 2.1790 |
| HDA2A  | CD32C  | CD33C  | 34.60 | 110.10 | 22.53 | 2.1790 |
| OD2C2C | SD1A   | CD33C  | 60.00 | 103.55 |       |        |
| SD1A   | CD33C  | HDA3A  | 35.00 | 108.80 |       |        |

DIHEDRALS

|                                   |        |       |        |        |   |        |
|-----------------------------------|--------|-------|--------|--------|---|--------|
| OD2C2C                            | SD1A   | CD33C | HDA3A  | 0.280  | 3 | 0.00   |
| SD1A                              | OD30B  | CD33C | HDA3A  | 0.200  | 3 | 0.00   |
| OD2C2C                            | SD1A   | OD30B | CD33C  | 0.200  | 3 | 0.00   |
| OD30B                             | SD1A   | OD30B | CD33C  | 0.200  | 3 | 0.00   |
| OD30E                             | CD32A  | CD33A | HDA3A  | 0.175  | 3 | 0.00   |
| CD32C                             | ND2A2  | SD1A  | OD2C2C | 0.500  | 3 | 0.00   |
| SD1A                              | ND2A2  | CD32C | HDA2A  | 0.200  | 3 | 0.00   |
| SD1A                              | ND2A2  | CD32C | CD33C  | 0.500  | 3 | 0.00   |
| OD2C2C                            | SD1A   | ND2A2 | HDP1A  | 0.200  | 3 | 0.00   |
| ND2A2                             | CD32C  | CD33C | HDA3A  | 0.200  | 3 | 0.00   |
| HDP1A                             | ND2A2  | CD32C | CD33C  | 0.200  | 3 | 0.00   |
| HDA2A                             | CD32C  | CD33C | HDA3A  | 0.200  | 3 | 0.00   |
| CD33C                             | ND2A2  | SD1A  | OD2C2C | 0.200  | 3 | 0.00   |
| SD1A                              | ND2A2  | CD33C | HDA3A  | 0.200  | 3 | 0.00   |
| ! New optimized dihedrals for DMP |        |       |        |        |   |        |
| CD33C                             | OD30BN | PD1AN | OD30BN | 0.6417 | 1 | 180.00 |
| CD33C                             | OD30BN | PD1AN | OD30BN | 0.7706 | 2 | 0.00   |
| CD33C                             | OD30BN | PD1AN | OD30BN | 0.1118 | 3 | 0.00   |
| CD33C                             | OD30BN | PD1AN | OD30BN | 0.0905 | 4 | 0.00   |
| CD33C                             | OD30BN | PD1AN | OD30BN | 0.0532 | 5 | 180.00 |
| CD33C                             | OD30BN | PD1AN | OD30BN | 0.0167 | 6 | 180.00 |
| CD33C                             | OD30BN | PD1AN | OD2C2C | 0.8520 | 1 | 0.00   |
| CD33C                             | OD30BN | PD1AN | OD2C2C | 0.3200 | 2 | 180.00 |
| CD33C                             | OD30BN | PD1AN | OD2C2C | 0.0732 | 3 | 0.00   |
| CD33C                             | OD30BN | PD1AN | OD2C2C | 0.1860 | 4 | 0.00   |
| CD33C                             | OD30BN | PD1AN | OD2C2C | 0.0002 | 5 | 0.00   |
| CD33C                             | OD30BN | PD1AN | OD2C2C | 0.0151 | 6 | 0.00   |

IMPROPERS

NONBONDED nbxmod 5 atom vatom cdiel vdistance switch vswitch -  
cutnb 16.0 ctofnb 12.0 ctonnb 10.0 eps 1.0 e14fac 1.0 wmin 1.5

END

RETURN
